# Supplementary material for: The role of aldehydes on sulfur based-new particle formation: a theoretical study
Source: Royal Society of Chemistry journal article supplement (doi:10.1039/d4ra00952e), 2024-01-01
Supplement: d4ra00952e1.pdf [file d4ra00952e1.pdf]

## Supplementary Material

# The role of aldehydes on sulfur based-new particle formation: a theoretical study

Guohua Zhang<sup>1,#</sup>, Min Liu<sup>2,#</sup>, Yaning Han<sup>2</sup>, Zhongteng Wang<sup>2</sup>, Wei Liu<sup>2</sup>, Ying Zhang<sup>1,\*</sup>, and Jing Xu<sup>2,\*</sup>

<sup>1</sup> Jinhua Advanced Research Institute, Jinhua, Zhejiang, 321013, P. R. China

<sup>2</sup> Department of Optical Engineering, College of Optical, Mechanical and Electrical Engineering, Zhejiang A&F University, Hangzhou, Zhejiang, 311300, P. R. China

<sup>#</sup>These authors contributed equally to this work.

\* Correspondence:

Jing Xu, Ying Zhang

[jingxu@zafu.edu.cn](mailto:jingxu@zafu.edu.cn), [y Zhang1981@sina.com](mailto:y Zhang1981@sina.com)

**Table S1.** The relative Gibbs free energies ( $\Delta G$ , in kcal/mol) of four isomers in FA-SA-A system.

| Method                                    | Isomer-1 | Isomer-2 | Isomer-3 | Isomer-4 |
|-------------------------------------------|----------|----------|----------|----------|
| MP2/6-311+G (d, p)//<br>B3LYP-D3/6-31G(d) | 0.00     | 0.41     | 5.36     | 7.51     |
| MP2/6-311+G (d, p)                        | 0.00     | 0.18     | 5.69     | 6.04     |
| MP2/aug-cc-pvtz//<br>B3LYP-D3/6-31G(d)    | 0.00     | 0.24     | 5.58     | 8.43     |
| B3LYP-D3/ aug-cc-pvtz                     | 0.00     | 0.30     | 6.85     | -        |

## Supplementary Figures

**Figure S1.** Structures, relative energies with zero-point energy correction ( $\Delta E$ , kcal/mol) and relative Gibbs free energy ( $\Delta G$ , kcal/mol) of the X-Y (X=FA/GL/MG; Y=SA) system at the MP2/6-311+G(d,p)//B3LYP-D3/6-31G(d) level.

**Figure S2.** Structures, relative energies with zero-point energy correction ( $\Delta E$ , kcal/mol) and relative Gibbs free energy ( $\Delta G$ , kcal/mol) of the X-Y (X=FA/GL/MG; Y=MSA) system at the MP2/6-311+G(d,p)//B3LYP-D3/6-31G(d) level.

**Figure S3.** The energies (in Hartree) and the corresponding geometric information of lowest-energy X-Y clusters from dynamic simulations at 300 K within 100 ps.

**Figure S4.** Structures, relative energies with zero-point energy correction ( $\Delta E$ , kcal/mol) and relative Gibbs free energy ( $\Delta G$ , kcal/mol) of the X-Y-Z (X=FA/GL/MG; Y=SA; Z=W) system at the MP2/6-311+G(d,p)//B3LYP-D3/6-31G(d) level.

**Figure S5.** Structures, relative energies with zero-point energy correction ( $\Delta E$ , kcal/mol) and relative Gibbs free energy ( $\Delta G$ , kcal/mol) of the X-Y-Z (X=FA/GL/MG; Y=MSA; Z=W) system at the MP2/6-311+G(d,p)//B3LYP-D3/6-31G(d) level.

**Figure S6.** Structures, relative energies with zero-point energy correction ( $\Delta E$ , kcal/mol) and relative Gibbs free energy ( $\Delta G$ , kcal/mol) of the X-Y-Z (X=FA/GL/MG; Y=SA; Z=A) system at the MP2/6-311+G(d,p)//B3LYP-D3/6-31G(d) level.

**Figure S7.** Structures, relative energies with zero-point energy correction ( $\Delta E$ , kcal/mol) and relative Gibbs free energy ( $\Delta G$ , kcal/mol) of the X-Y-Z (X=FA/GL/MG; Y=MSA; Z=A) system at the MP2/6-311+G(d,p)//B3LYP-D3/6-31G(d) level.

**Figure S8.** Structures, relative energies with zero-point energy correction ( $\Delta E$ , kcal/mol) and relative Gibbs free energy ( $\Delta G$ , kcal/mol) of the X-Y-Z (X=FA/GL/MG; Y=SA; Z=MA) system at the MP2/6-311+G(d,p)//B3LYP-D3/6-31G(d) level.

**Figure S9.** Structures, relative energies with zero-point energy correction ( $\Delta E$ , kcal/mol) and relative Gibbs free energy ( $\Delta G$ , kcal/mol) of the X-Y-Z (X=FA/GL/MG; Y=MSA; Z=MA) system at the MP2/6-311+G(d,p)//B3LYP-D3/6-31G(d) level.

**Figure S10.** The plots of RDG versus  $\text{sign}(\lambda_2)\rho$  function, the visualized bonding isosurfaces for the most stable isomers of X-Y-Z (X=GL; Y=SA/MSA; Z=W/A/MA).

**Figure S11.** The plots of RDG versus  $\text{sign}(\lambda_2)\rho$  function, the visualized bonding isosurfaces for the most stable isomers of X-Y-Z (X=MG; Y=SA/MSA; Z=W/A/MA).

**Figure S12.** The energies (in Hartree) and the corresponding geometric information of lowest-energy structures in X-Y-Z (X=MG; Y=SA/MSA; Z=W) from dynamic simulations at 300 K within 100 ps.

**Figure S13.** The energies (in Hartree) and the corresponding geometric information of lowest-energy structures in X-Y-Z (X=MG; Y=SA/MSA; Z=A) from dynamic simulations at 300 K within 100 ps.

**Figure S14.** The energies (in Hartree) and the corresponding geometric information of lowest-energy structures in X-Y-Z (X=MG; Y=SA/MSA; Z=MA) from dynamic simulations at 300 K within 100 ps.

**Section Frequencies.** Details of Harmonic frequencies ( $\text{cm}^{-1}$ ), IR intensities (KM/Mole), Raman scattering activities ( $\text{Å}^4/\text{AMU}$ ), depolarization ratios for plane and unpolarized incident light, reduced masses (AMU), force constants (mDyne/Å), and normal coordinates for all the most stable structures.

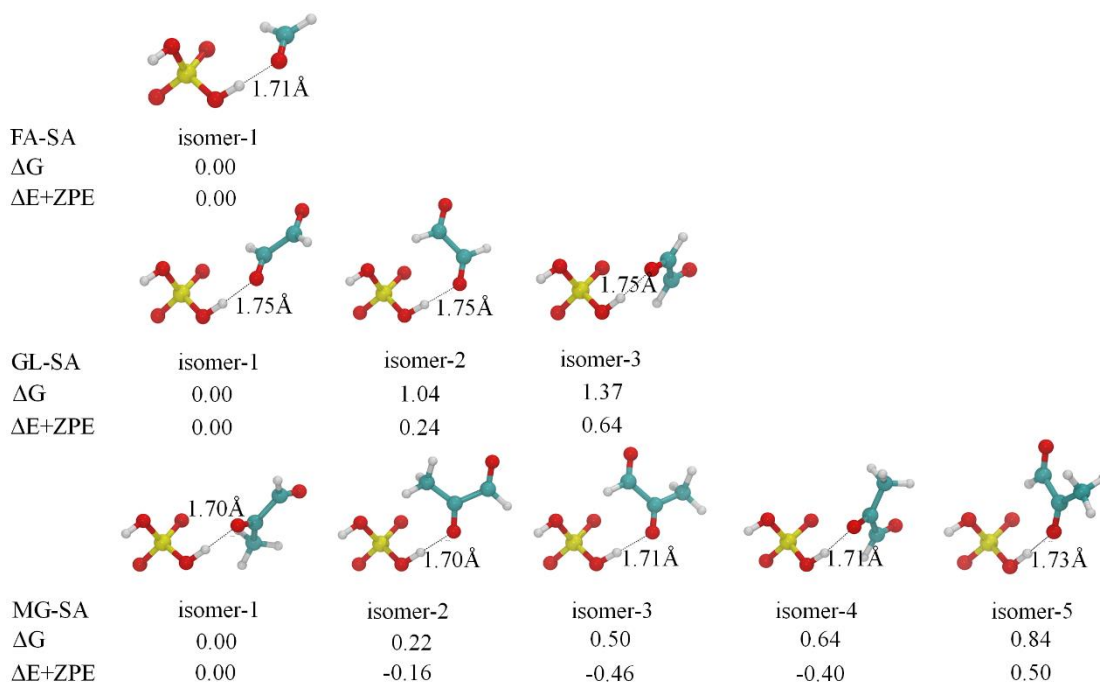

Figure S1. Structures, relative energies with zero-point energy correction ( $\Delta E$ , kcal/mol) and relative Gibbs free energy ( $\Delta G$ , kcal/mol) of the X-Y (X=FA/GL/MG; Y=SA) system at the MP2/6-311+G(d,p)//B3LYP-D3/6-31G(d) level.

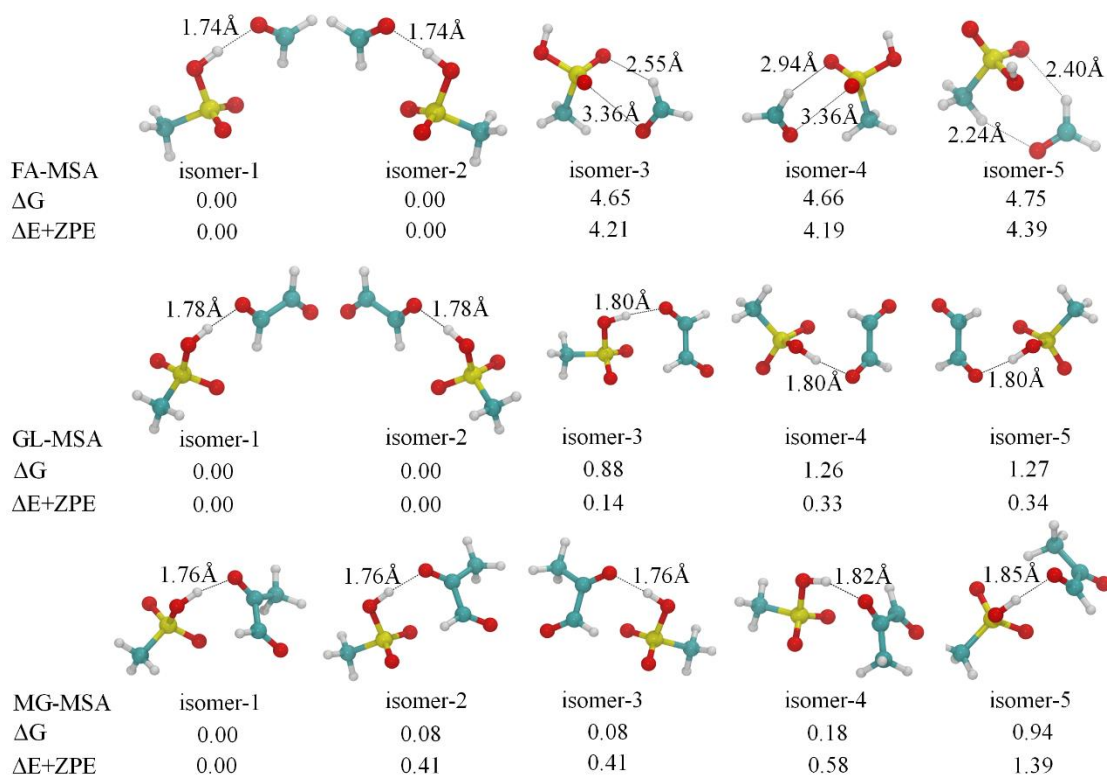

Figure S2. Structures, relative energies with zero-point energy correction ( $\Delta E$ , kcal/mol) and relative Gibbs free energy ( $\Delta G$ , kcal/mol) of the X-Y (X=FA/GL/MG; Y=MSA) system at the MP2/6-311+G(d,p)//B3LYP-D3/6-31G(d) level.

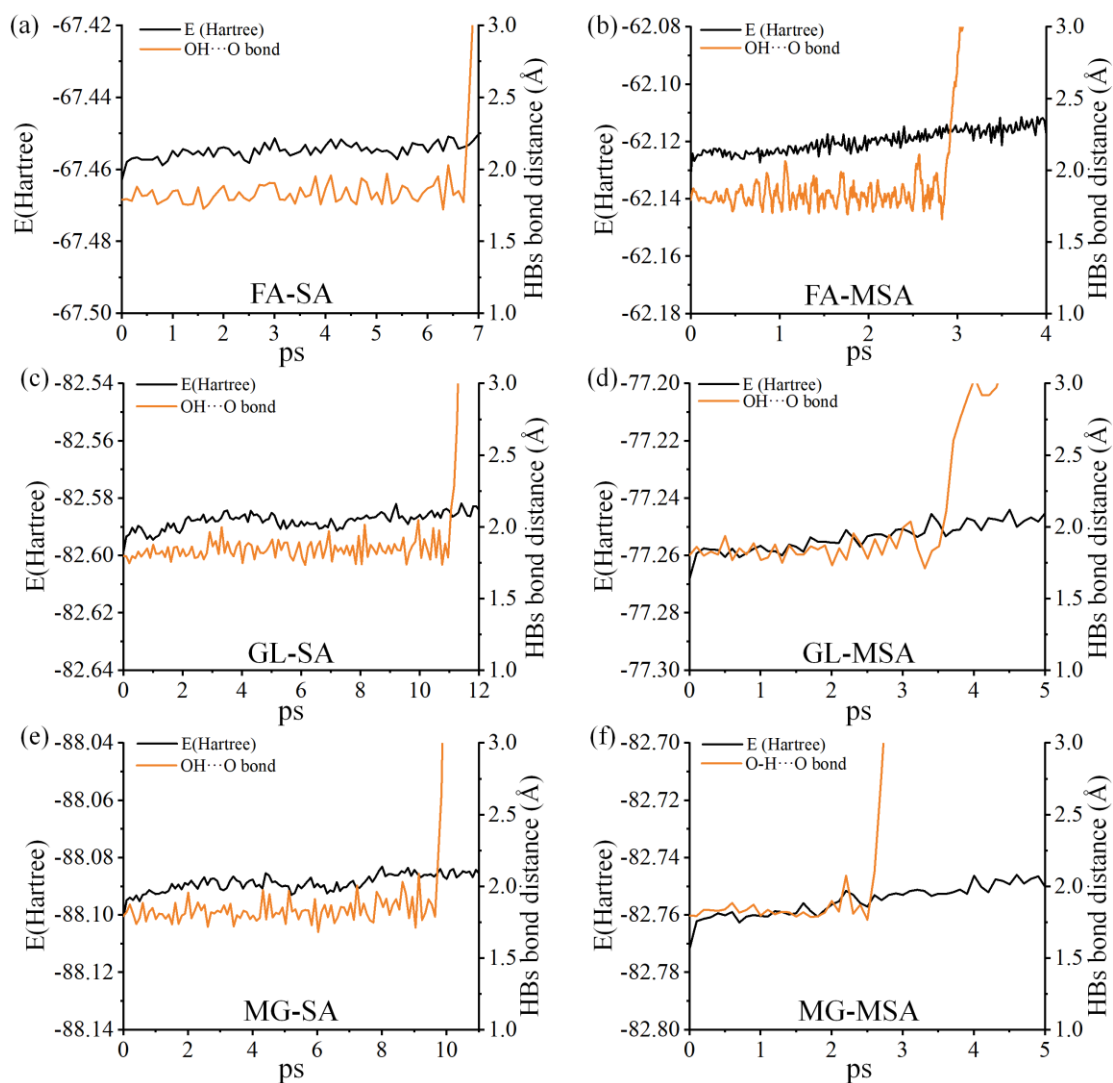

Figure S3. The energies (in Hartree) and the corresponding geometric information of lowest-energy X-Y clusters from dynamic simulations at 300 K within 100 ps.

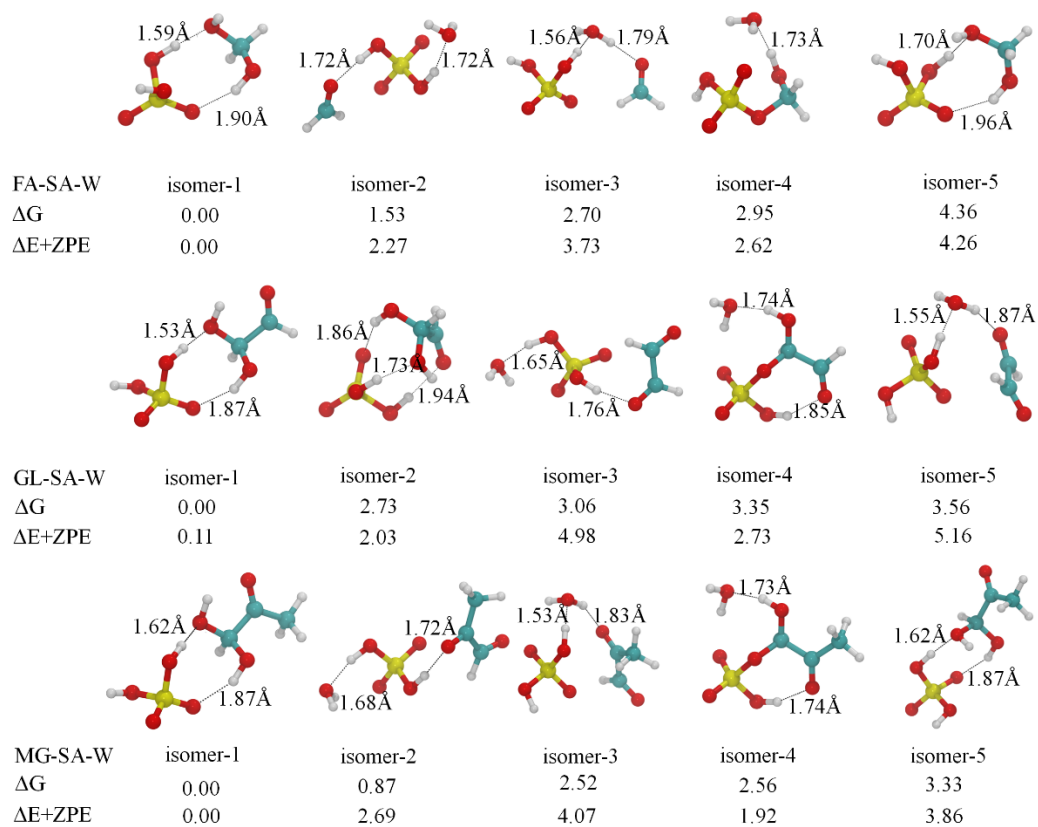

Figure S4. Structures, relative energies with zero-point energy correction ( $\Delta E$ , kcal/mol) and relative Gibbs free energy ( $\Delta G$ , kcal/mol) of the X-Y-Z (X=FA/GL/MG; Y=SA; Z=W) system at the MP2/6-311+G(d,p)/B3LYP-D3/6-31G(d) level.

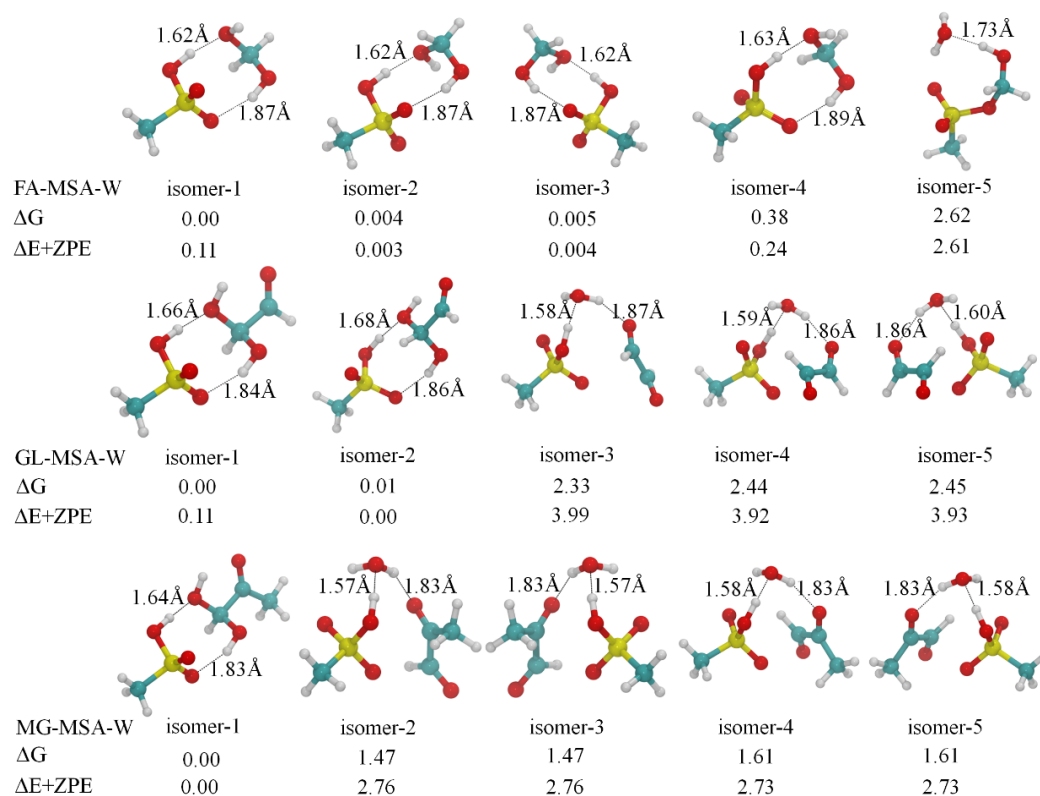

Figure S5. Structures, relative energies with zero-point energy correction ( $\Delta E$ , kcal/mol) and relative Gibbs free energy ( $\Delta G$ , kcal/mol) of the X-Y-Z (X=FA/GL/MG; Y=MSA; Z=W) system at the MP2/6-311+G(d,p)//B3LYP-D3/6-31G(d) level.

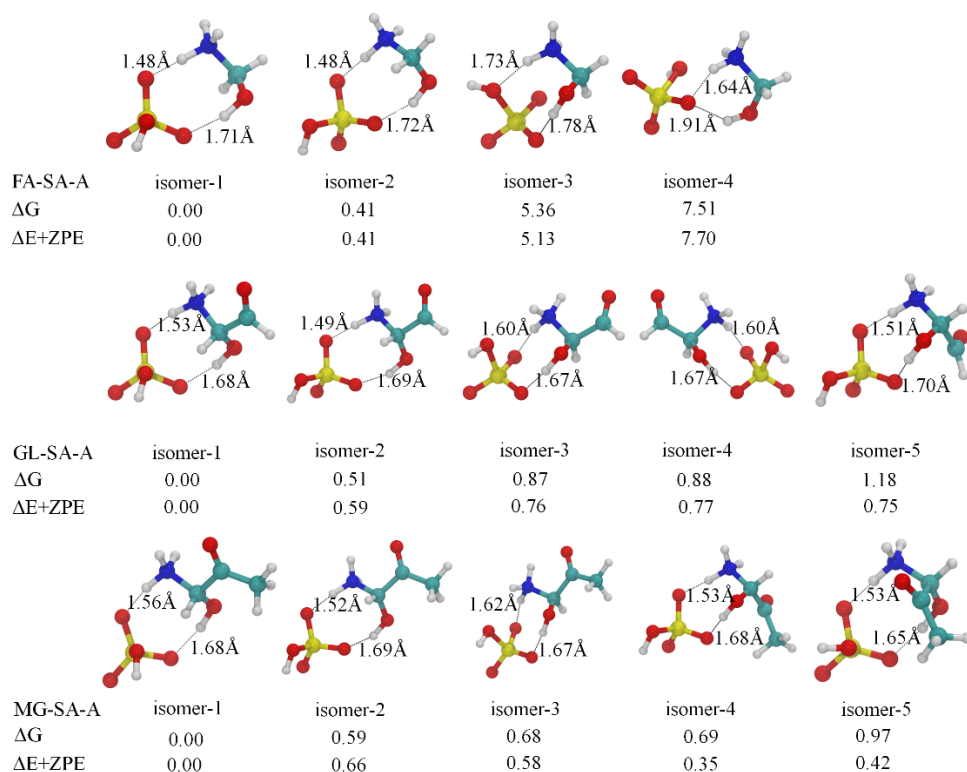

Figure S6. Structures, relative energies with zero-point energy correction ( $\Delta E$ , kcal/mol) and relative Gibbs free energy ( $\Delta G$ , kcal/mol) of the X-Y-Z (X=FA/GL/MG; Y=SA; Z=A) system at the MP2/6-311+G(d,p)//B3LYP-D3/6-31G(d) level.

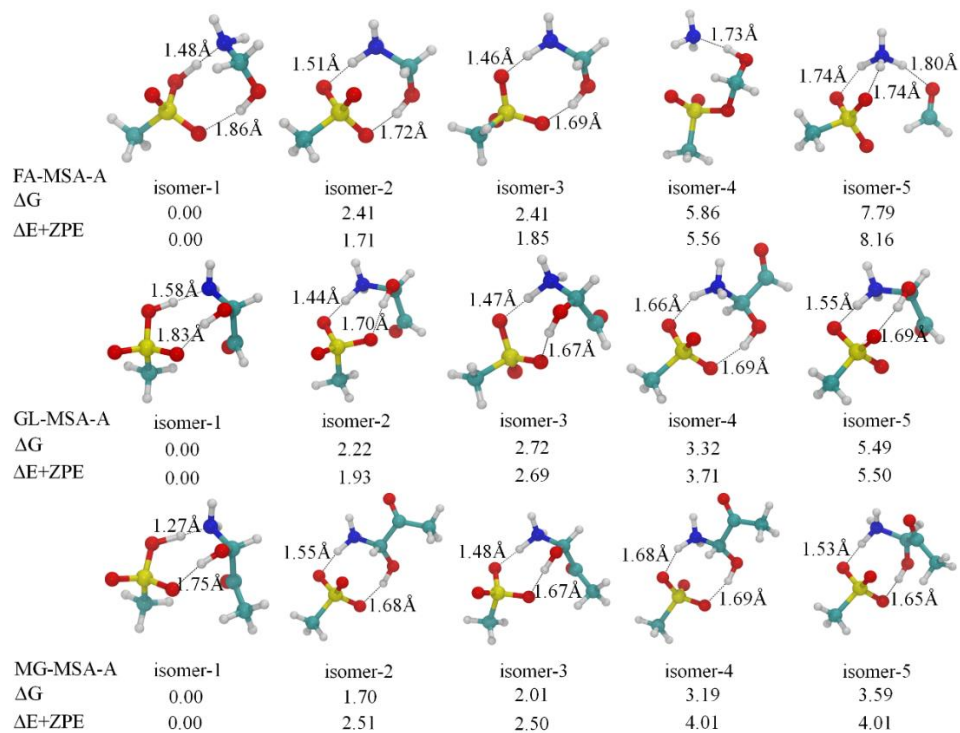

Figure S7. Structures, relative energies with zero-point energy correction ( $\Delta E$ , kcal/mol) and relative Gibbs free energy ( $\Delta G$ , kcal/mol) of the X-Y-Z (X=FA/GL/MG; Y=MSA; Z=A) system at the MP2/6-311+G(d,p)//B3LYP-D3/6-31G(d) level.

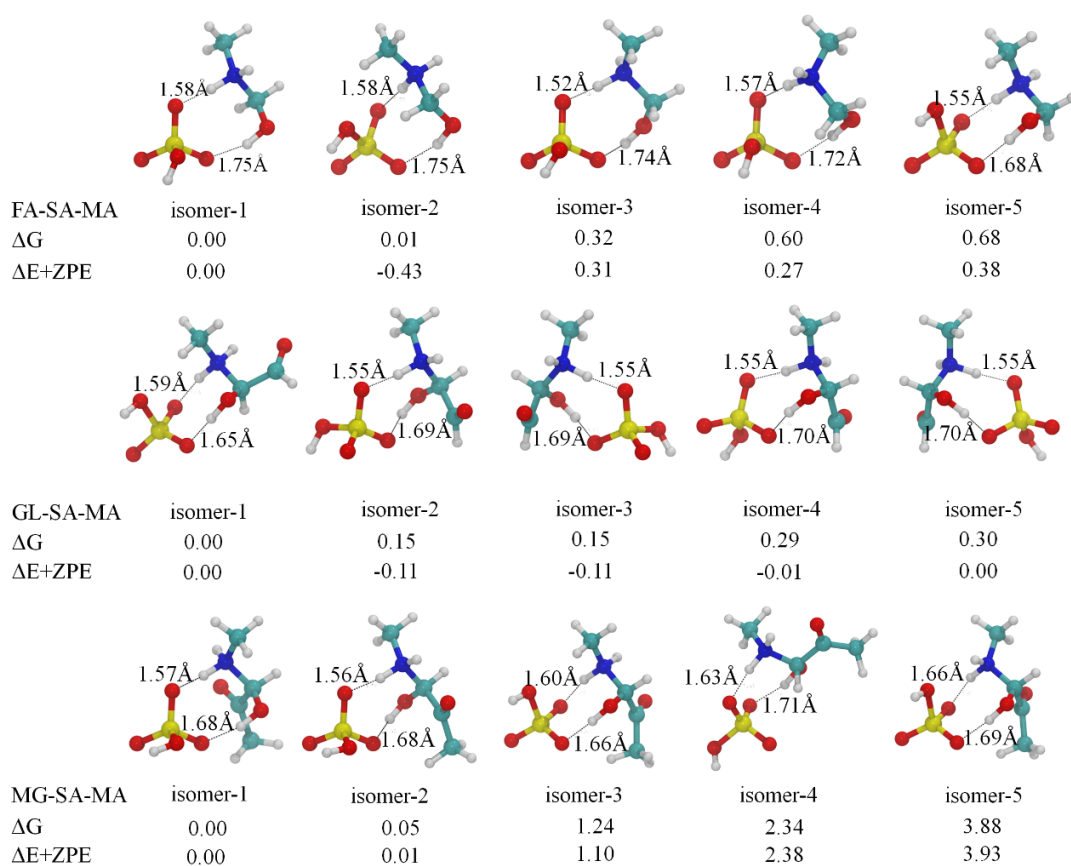

Figure S8. Structures, relative energies with zero-point energy correction ( $\Delta E$ , kcal/mol) and relative Gibbs free energy ( $\Delta G$ , kcal/mol) of the X-Y-Z (X=FA/GL/MG; Y=SA; Z=MA) system at the MP2/6-311+G(d,p)//B3LYP-D3/6-31G(d) level.



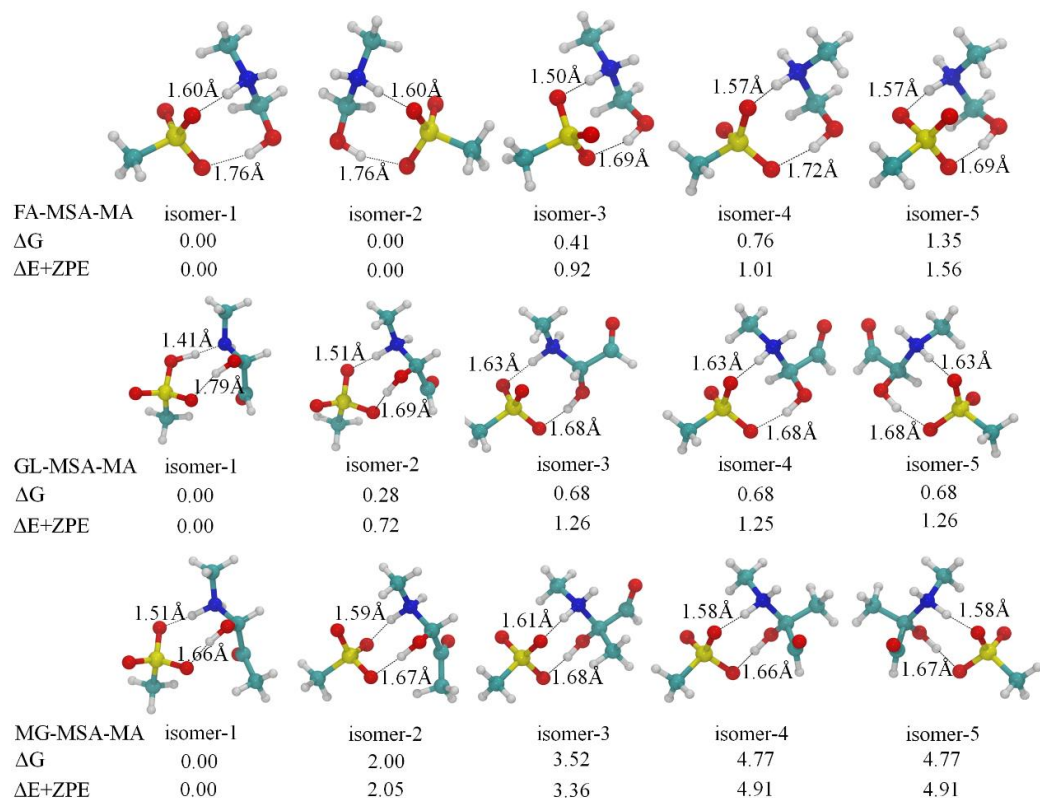

Figure S9. Structures, relative energies with zero-point energy correction ( $\Delta E$ , kcal/mol) and relative Gibbs free energy ( $\Delta G$ , kcal/mol) of the X-Y-Z (X=FA/GL/MG; Y=MSA; Z=MA) system at the MP2/6-311+G(d,p)//B3LYP-D3/6-31G(d) level.

1) SA-based

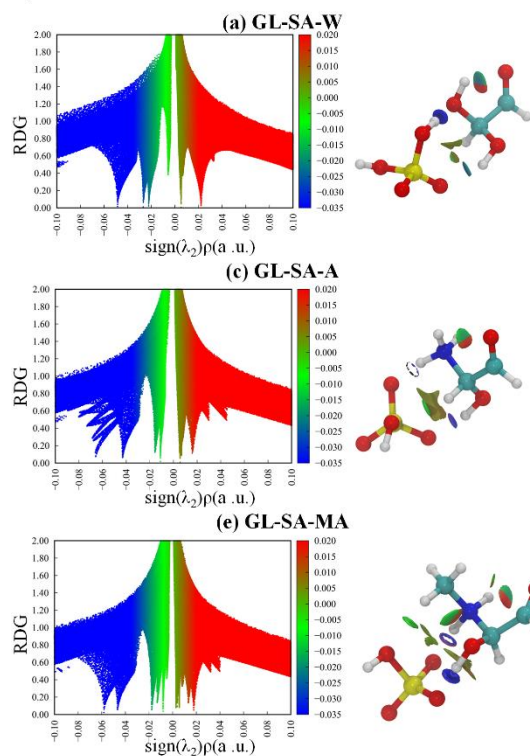

2) MSA-based

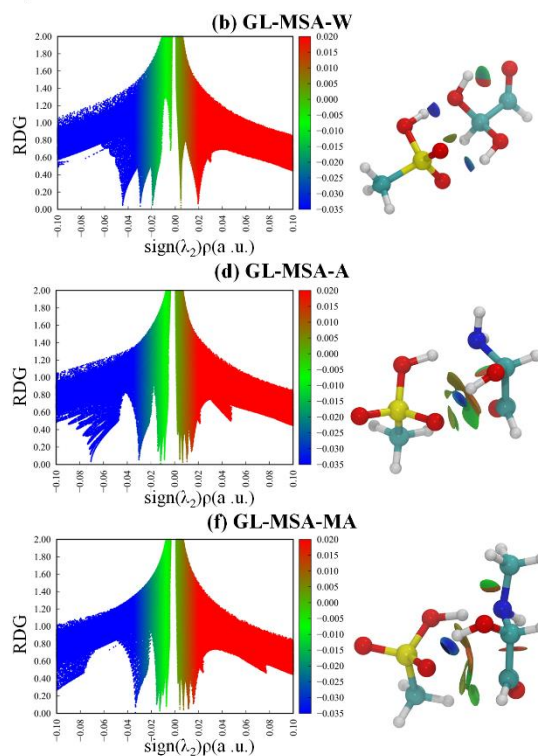

Figure S10. The plots of RDG versus  $\text{sign}(\lambda_2)\rho$  function, the visualized bonding isosurfaces for the most stable isomers of X-Y-Z (X=GL; Y=SA/MSA; Z=W/A/MA).

1) SA-based

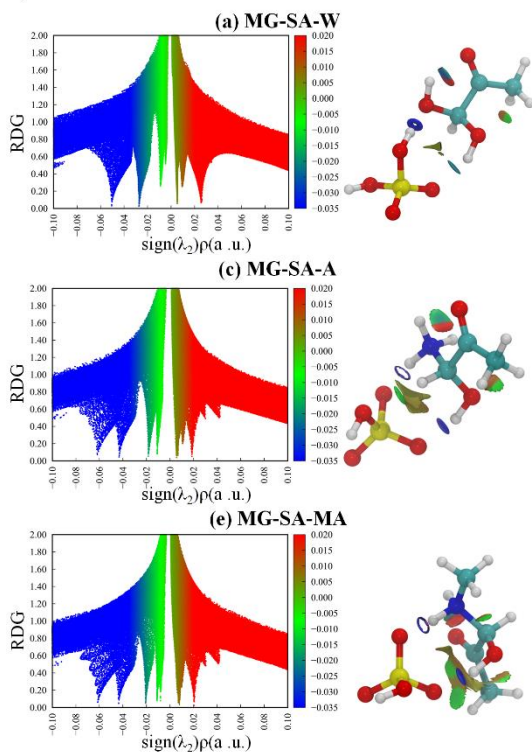

2) MSA-based

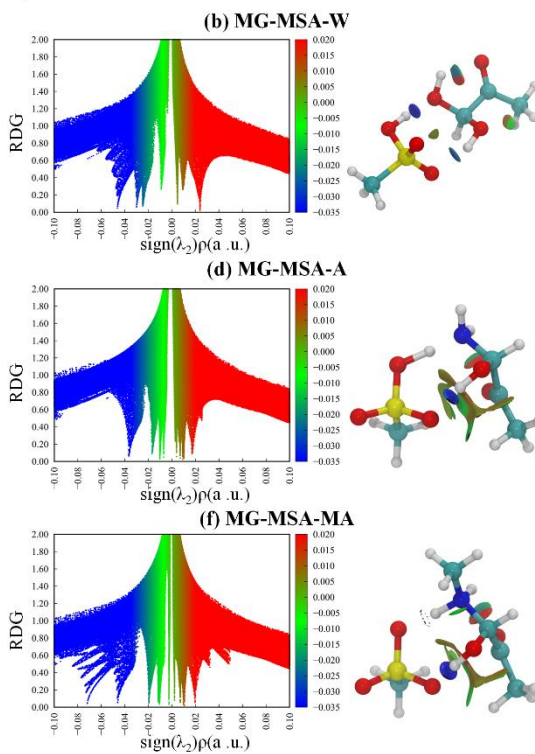

Figure S11. The plots of RDG versus  $\text{sign}(\lambda_2)\rho$  function, the visualized bonding isosurfaces for the most stable isomers of X-Y-Z (X=MG; Y=SA/MSA; Z=W/A/MA).

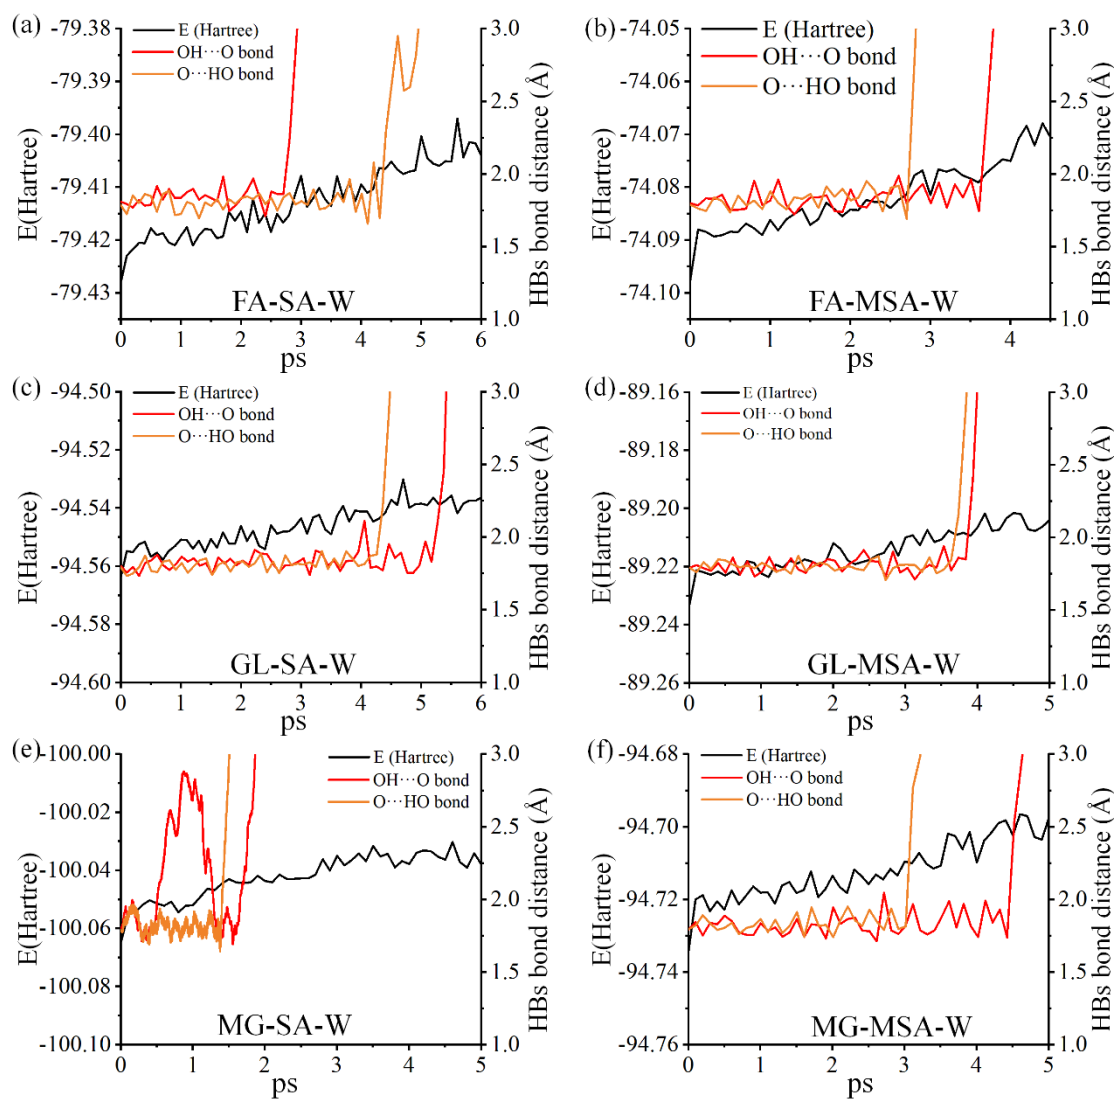

Figure S12. The energies (in Hartree) and the corresponding geometric information of lowest-energy structures in X-Y-Z (X=MG; Y=SA/MSA; Z=W) from dynamic simulations at 300 K within 100 ps.

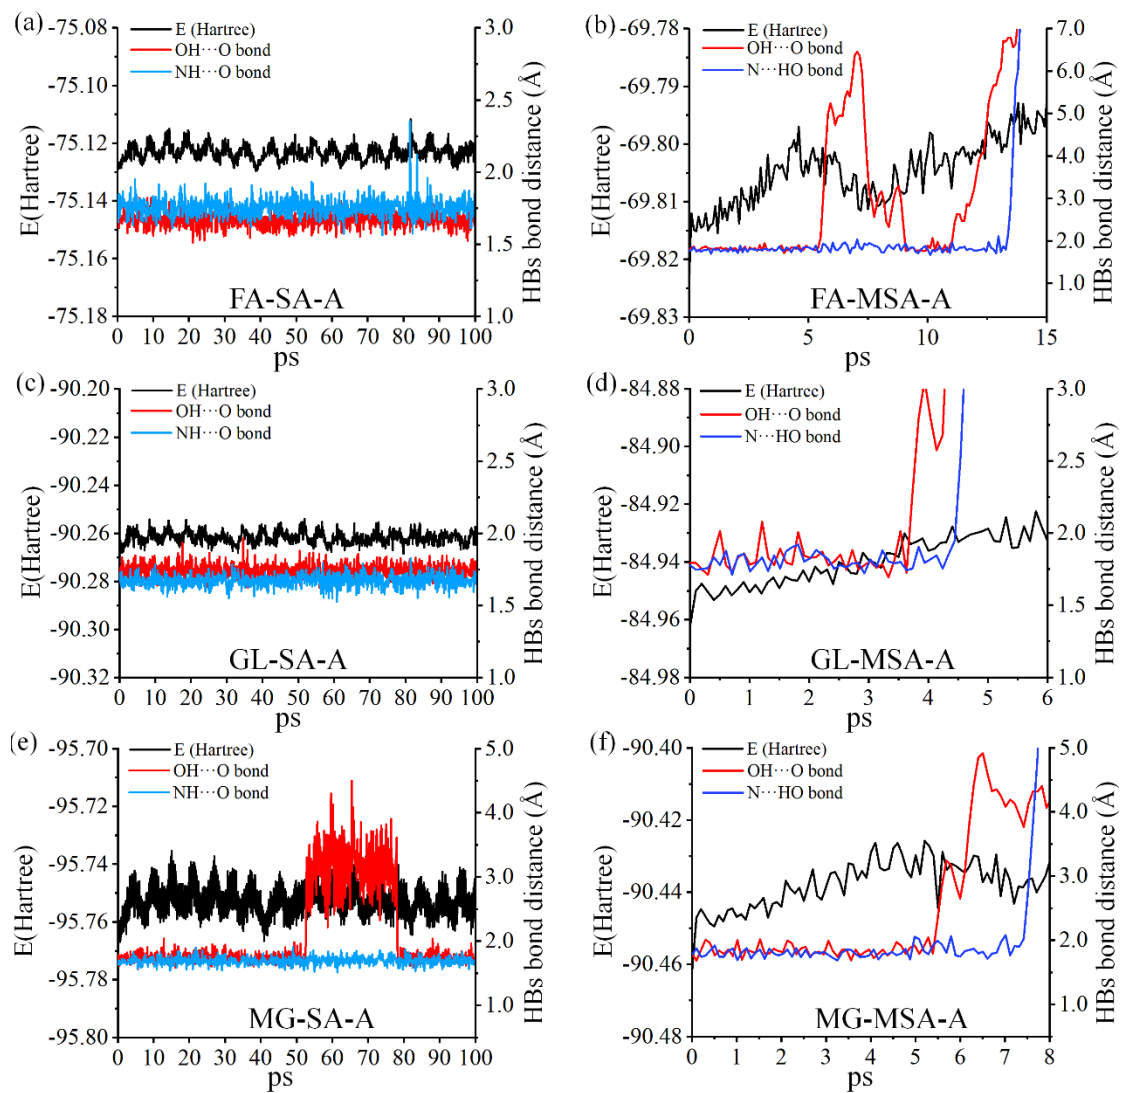

Figure S13. The energies (in Hartree) and the corresponding geometric information of lowest-energy structures in X-Y-Z (X=MG; Y=SA/MSA; Z=A) from dynamic simulations at 300 K within 100 ps.

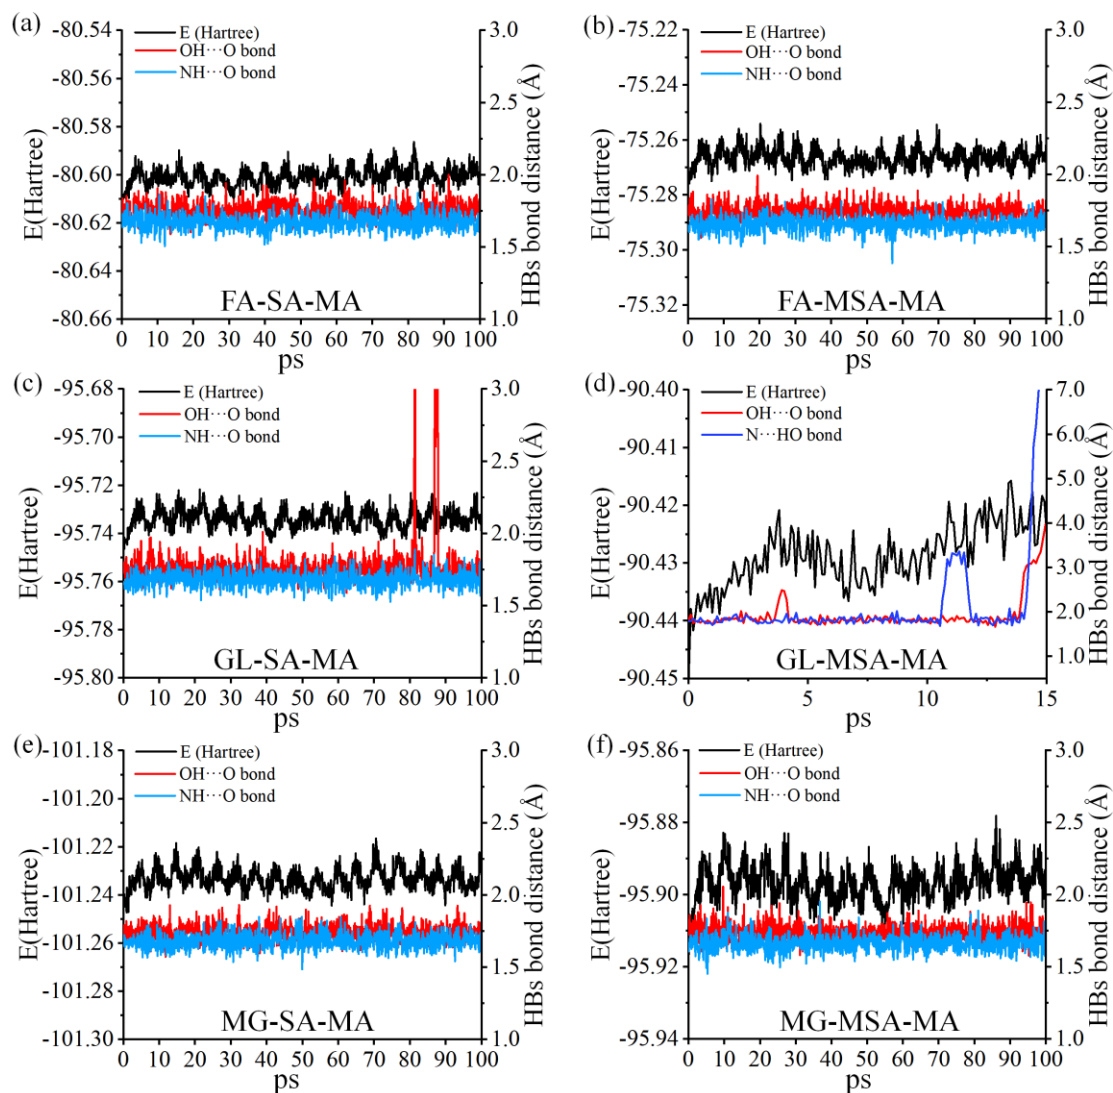

Figure S14. The energies (in Hartree) and the corresponding geometric information of lowest-energy structures in X-Y-Z (X=MG; Y=SA/MSA; Z=MA) from dynamic simulations at 300 K within 100 ps.

**Section Frequencies.** Details of Harmonic frequencies (cm<sup>-1</sup>), IR intensities (KM/Mole), Raman scattering activities (A<sup>4</sup>/AMU), depolarization ratios for plane and unpolarized incident light, reduced masses (AMU), force constants (mDyne/A), and normal coordinates for all the most stable structures.

**FA-SA:**

|                | 1         | 2         | 3         |
|----------------|-----------|-----------|-----------|
|                | A         | A         | A         |
| Frequencies -- | 39.8609   | 86.5150   | 135.1494  |
| Red. masses -- | 3.7653    | 8.5140    | 11.6604   |
| Frc consts --  | 0.0035    | 0.0375    | 0.1255    |
| IR Inten --    | 14.6135   | 1.0732    | 1.6754    |
|                | 4         | 5         | 6         |
|                | A         | A         | A         |
| Frequencies -- | 168.1929  | 220.2504  | 281.4278  |
| Red. masses -- | 5.1387    | 3.8205    | 1.0736    |
| Frc consts --  | 0.0856    | 0.1092    | 0.0501    |
| IR Inten --    | 0.6801    | 66.0985   | 1.9028    |
|                | 7         | 8         | 9         |
|                | A         | A         | A         |
| Frequencies -- | 340.9616  | 388.3201  | 472.6869  |
| Red. masses -- | 2.8973    | 7.8996    | 1.6061    |
| Frc consts --  | 0.1985    | 0.7018    | 0.2114    |
| IR Inten --    | 18.0535   | 5.8976    | 50.3134   |
|                | 10        | 11        | 12        |
|                | A         | A         | A         |
| Frequencies -- | 509.3705  | 535.5155  | 539.7011  |
| Red. masses -- | 5.2228    | 12.5900   | 10.0062   |
| Frc consts --  | 0.7984    | 2.1273    | 1.7172    |
| IR Inten --    | 17.3266   | 12.4399   | 72.1348   |
|                | 13        | 14        | 15        |
|                | A         | A         | A         |
| Frequencies -- | 765.2677  | 851.7863  | 882.8081  |
| Red. masses -- | 12.9573   | 8.2960    | 1.1562    |
| Frc consts --  | 4.4709    | 3.5463    | 0.5309    |
| IR Inten --    | 135.8146  | 229.2068  | 181.5746  |
|                | 16        | 17        | 18        |
|                | A         | A         | A         |
| Frequencies -- | 1153.7031 | 1172.5533 | 1243.5657 |
| Red. masses -- | 7.8179    | 1.3219    | 1.3429    |
| Frc consts --  | 6.1310    | 1.0708    | 1.2236    |
| IR Inten --    | 230.2615  | 62.6203   | 7.5591    |
|                | 19        | 20        | 21        |
|                | A         | A         | A         |
| Frequencies -- | 1300.6404 | 1326.3090 | 1418.1239 |

|                |           |           |           |
|----------------|-----------|-----------|-----------|
| Red. masses -- | 1.3161    | 1.6382    | 2.4331    |
| Frc consts --  | 1.3117    | 1.6979    | 2.8829    |
| IR Inten --    | 2.5908    | 122.5681  | 277.4894  |
|                | 22        | 23        | 24        |
|                | A         | A         | A         |
| Frequencies -- | 1561.8847 | 1760.3163 | 2999.5551 |
| Red. masses -- | 1.1436    | 6.0132    | 1.0520    |
| Frc consts --  | 1.6437    | 10.9783   | 5.5769    |
| IR Inten --    | 14.2100   | 81.1457   | 136.4499  |
|                | 25        | 26        | 27        |
|                | A         | A         | A         |
| Frequencies -- | 3115.5219 | 3191.0421 | 3716.0248 |
| Red. masses -- | 1.1182    | 1.0725    | 1.0660    |
| Frc consts --  | 6.3948    | 6.4342    | 8.6732    |
| IR Inten --    | 10.9031   | 1343.1424 | 125.9338  |

**FA-MSA:**

|                |          |          |          |
|----------------|----------|----------|----------|
|                | 1        | 2        | 3        |
|                | A        | A        | A        |
| Frequencies -- | 40.6579  | 81.4621  | 122.8675 |
| Red. masses -- | 3.7064   | 7.4478   | 7.3674   |
| Frc consts --  | 0.0036   | 0.0291   | 0.0655   |
| IR Inten --    | 16.1654  | 2.4243   | 3.7668   |
|                | 4        | 5        | 6        |
|                | A        | A        | A        |
| Frequencies -- | 161.2876 | 213.4170 | 232.0150 |
| Red. masses -- | 4.8321   | 2.9371   | 1.0974   |
| Frc consts --  | 0.0741   | 0.0788   | 0.0348   |
| IR Inten --    | 1.7660   | 56.7814  | 5.1612   |
|                | 7        | 8        | 9        |
|                | A        | A        | A        |
| Frequencies -- | 292.5796 | 316.9620 | 331.4922 |
| Red. masses -- | 1.0663   | 3.8298   | 3.9447   |
| Frc consts --  | 0.0538   | 0.2267   | 0.2554   |
| IR Inten --    | 1.5779   | 0.5439   | 16.0226  |
|                | 10       | 11       | 12       |
|                | A        | A        | A        |
| Frequencies -- | 456.5367 | 491.5209 | 513.4835 |
| Red. masses -- | 7.0248   | 8.0764   | 7.2235   |
| Frc consts --  | 0.8627   | 1.1496   | 1.1221   |
| IR Inten --    | 6.7155   | 24.8706  | 30.2569  |
|                | 13       | 14       | 15       |
|                | A        | A        | A        |
| Frequencies -- | 726.7718 | 811.5144 | 827.7446 |
| Red. masses -- | 6.6812   | 1.2468   | 3.8863   |



|                |           |           |           |
|----------------|-----------|-----------|-----------|
| Frc consts --  | 2.0792    | 0.4838    | 1.5688    |
| IR Inten --    | 29.5165   | 116.7226  | 188.5008  |
|                | 16        | 17        | 18        |
|                | A         | A         | A         |
| Frequencies -- | 1001.0239 | 1014.4209 | 1128.2431 |
| Red. masses -- | 1.3529    | 1.4262    | 8.9651    |
| Frc consts --  | 0.7987    | 0.8647    | 6.7238    |
| IR Inten --    | 2.4789    | 21.4608   | 132.7398  |
|                | 19        | 20        | 21        |
|                | A         | A         | A         |
| Frequencies -- | 1246.8458 | 1296.6415 | 1308.4514 |
| Red. masses -- | 1.3421    | 3.2994    | 1.5583    |
| Frc consts --  | 1.2293    | 3.2683    | 1.5719    |
| IR Inten --    | 4.5741    | 247.7973  | 66.4645   |
|                | 22        | 23        | 24        |
|                | A         | A         | A         |
| Frequencies -- | 1337.9015 | 1391.4209 | 1468.7689 |
| Red. masses -- | 1.2914    | 1.2268    | 1.0473    |
| Frc consts --  | 1.3620    | 1.3994    | 1.3311    |
| IR Inten --    | 124.2812  | 18.7665   | 3.5512    |
|                | 25        | 26        | 27        |
|                | A         | A         | A         |
| Frequencies -- | 1476.1040 | 1564.4115 | 1758.8607 |
| Red. masses -- | 1.0435    | 1.1446    | 5.9247    |
| Frc consts --  | 1.3396    | 1.6505    | 10.7988   |
| IR Inten --    | 6.4829    | 17.3462   | 71.4541   |
|                | 28        | 29        | 30        |
|                | A         | A         | A         |
| Frequencies -- | 2991.3283 | 3099.3967 | 3105.7592 |
| Red. masses -- | 1.0517    | 1.0298    | 1.1189    |
| Frc consts --  | 5.5447    | 5.8287    | 6.3588    |
| IR Inten --    | 124.4150  | 0.0294    | 15.9757   |
|                | 31        | 32        | 33        |
|                | A         | A         | A         |
| Frequencies -- | 3214.1033 | 3221.1029 | 3237.9608 |
| Red. masses -- | 1.1062    | 1.1076    | 1.0705    |
| Frc consts --  | 6.7332    | 6.7708    | 6.6126    |
| IR Inten --    | 3.1640    | 0.0827    | 1251.3683 |

**GL-SA:**

|                |         |         |         |
|----------------|---------|---------|---------|
|                | 1       | 2       | 3       |
|                | A       | A       | A       |
| Frequencies -- | 29.0234 | 68.8615 | 84.3348 |
| Red. masses -- | 4.7423  | 8.0964  | 4.9883  |
| Frc consts --  | 0.0024  | 0.0226  | 0.0209  |

|             |    |           |           |           |
|-------------|----|-----------|-----------|-----------|
| IR Inten    | -- | 3.2053    | 0.5946    | 0.6473    |
|             |    | 4         | 5         | 6         |
|             |    | A         | A         | A         |
| Frequencies | -- | 96.2441   | 118.1096  | 128.2405  |
| Red. masses | -- | 3.5651    | 5.3563    | 11.6218   |
| Frc consts  | -- | 0.0195    | 0.0440    | 0.1126    |
| IR Inten    | -- | 3.1679    | 21.6522   | 1.6653    |
|             |    | 7         | 8         | 9         |
|             |    | A         | A         | A         |
| Frequencies | -- | 158.4940  | 338.5215  | 362.9082  |
| Red. masses | -- | 9.2103    | 3.2154    | 4.4791    |
| Frc consts  | -- | 0.1363    | 0.2171    | 0.3476    |
| IR Inten    | -- | 12.3782   | 12.7563   | 96.7313   |
|             |    | 10        | 11        | 12        |
|             |    | A         | A         | A         |
| Frequencies | -- | 385.4316  | 470.0924  | 506.7335  |
| Red. masses | -- | 7.9205    | 1.5940    | 4.7397    |
| Frc consts  | -- | 0.6933    | 0.2075    | 0.7171    |
| IR Inten    | -- | 6.3757    | 46.4436   | 21.6499   |
|             |    | 13        | 14        | 15        |
|             |    | A         | A         | A         |
| Frequencies | -- | 534.8002  | 537.3475  | 574.7070  |
| Red. masses | -- | 12.0936   | 10.9539   | 9.8984    |
| Frc consts  | -- | 2.0379    | 1.8635    | 1.9262    |
| IR Inten    | -- | 13.2605   | 66.6374   | 5.0177    |
|             |    | 16        | 17        | 18        |
|             |    | A         | A         | A         |
| Frequencies | -- | 762.0340  | 799.4551  | 848.1520  |
| Red. masses | -- | 4.8908    | 1.3168    | 10.4862   |
| Frc consts  | -- | 1.6733    | 0.4958    | 4.4444    |
| IR Inten    | -- | 60.7485   | 164.8613  | 316.4901  |
|             |    | 19        | 20        | 21        |
|             |    | A         | A         | A         |
| Frequencies | -- | 867.1127  | 1094.8813 | 1100.1181 |
| Red. masses | -- | 1.2357    | 1.8038    | 4.4619    |
| Frc consts  | -- | 0.5474    | 1.2740    | 3.1816    |
| IR Inten    | -- | 13.0421   | 0.0857    | 2.6224    |
|             |    | 22        | 23        | 24        |
|             |    | A         | A         | A         |
| Frequencies | -- | 1154.7108 | 1170.9949 | 1300.9170 |
| Red. masses | -- | 7.1053    | 1.3423    | 1.3926    |
| Frc consts  | -- | 5.5819    | 1.0845    | 1.3886    |
| IR Inten    | -- | 220.0026  | 59.1172   | 85.1456   |
|             |    | 25        | 26        | 27        |

|                |           |           |           |
|----------------|-----------|-----------|-----------|
|                | A         | A         | A         |
| Frequencies -- | 1366.7792 | 1403.8723 | 1415.3928 |
| Red. masses -- | 1.1894    | 1.4150    | 2.4922    |
| Frc consts --  | 1.3091    | 1.6431    | 2.9416    |
| IR Inten --    | 6.1221    | 96.2109   | 229.7863  |
|                | 28        | 29        | 30        |
|                | A         | A         | A         |
| Frequencies -- | 1741.4730 | 1771.0599 | 2996.6264 |
| Red. masses -- | 10.2059   | 9.2679    | 1.0897    |
| Frc consts --  | 18.2362   | 17.1276   | 5.7654    |
| IR Inten --    | 115.8014  | 41.0698   | 60.2292   |
|                | 31        | 32        | 33        |
|                | A         | A         | A         |
| Frequencies -- | 3088.8415 | 3294.1044 | 3714.7322 |
| Red. masses -- | 1.0922    | 1.0704    | 1.0661    |
| Frc consts --  | 6.1399    | 6.8435    | 8.6675    |
| IR Inten --    | 9.1507    | 1322.3820 | 131.0964  |

**GL-MSA:**

|                |          |          |          |
|----------------|----------|----------|----------|
|                | 1        | 2        | 3        |
|                | A        | A        | A        |
| Frequencies -- | 35.3378  | 66.4879  | 82.1729  |
| Red. masses -- | 5.3300   | 8.5336   | 5.0797   |
| Frc consts --  | 0.0039   | 0.0222   | 0.0202   |
| IR Inten --    | 5.0259   | 0.8858   | 3.9803   |
|                | 4        | 5        | 6        |
|                | A        | A        | A        |
| Frequencies -- | 101.3415 | 118.7711 | 119.6181 |
| Red. masses -- | 3.3407   | 5.4465   | 4.8813   |
| Frc consts --  | 0.0202   | 0.0453   | 0.0412   |
| IR Inten --    | 0.6368   | 8.2415   | 16.9241  |
|                | 7        | 8        | 9        |
|                | A        | A        | A        |
| Frequencies -- | 147.8222 | 229.3938 | 313.6322 |
| Red. masses -- | 5.8858   | 1.0548   | 4.2451   |
| Frc consts --  | 0.0758   | 0.0327   | 0.2460   |
| IR Inten --    | 9.9286   | 0.1982   | 0.8453   |
|                | 10       | 11       | 12       |
|                | A        | A        | A        |
| Frequencies -- | 327.8492 | 362.6240 | 452.5123 |
| Red. masses -- | 3.8285   | 4.5731   | 6.5027   |
| Frc consts --  | 0.2425   | 0.3543   | 0.7845   |
| IR Inten --    | 5.9219   | 98.1014  | 4.6159   |
|                | 13       | 14       | 15       |
|                | A        | A        | A        |

|                |           |           |           |
|----------------|-----------|-----------|-----------|
| Frequencies -- | 489.1052  | 511.8891  | 573.7975  |
| Red. masses -- | 7.8261    | 7.3300    | 9.9167    |
| Frc consts --  | 1.1031    | 1.1316    | 1.9237    |
| IR Inten --    | 27.6393   | 29.8796   | 3.4266    |
|                | 16        | 17        | 18        |
|                | A         | A         | A         |
| Frequencies -- | 720.4146  | 734.9451  | 817.9718  |
| Red. masses -- | 3.4238    | 1.2908    | 7.5850    |
| Frc consts --  | 1.0469    | 0.4108    | 2.9901    |
| IR Inten --    | 35.6097   | 98.0020   | 209.6815  |
|                | 19        | 20        | 21        |
|                | A         | A         | A         |
| Frequencies -- | 866.8136  | 1001.6082 | 1013.8782 |
| Red. masses -- | 1.2298    | 1.3517    | 1.4239    |
| Frc consts --  | 0.5444    | 0.7990    | 0.8624    |
| IR Inten --    | 0.6449    | 2.5866    | 20.4700   |
|                | 22        | 23        | 24        |
|                | A         | A         | A         |
| Frequencies -- | 1098.4823 | 1101.0450 | 1128.0081 |
| Red. masses -- | 2.5560    | 2.5606    | 7.9783    |
| Frc consts --  | 1.8172    | 1.8289    | 5.9811    |
| IR Inten --    | 2.4630    | 4.2192    | 115.6574  |
|                | 25        | 26        | 27        |
|                | A         | A         | A         |
| Frequencies -- | 1289.9046 | 1319.0769 | 1369.6839 |
| Red. masses -- | 1.8947    | 2.4392    | 1.1881    |
| Frc consts --  | 1.8574    | 2.5006    | 1.3133    |
| IR Inten --    | 196.5469  | 247.0047  | 6.0469    |
|                | 28        | 29        | 30        |
|                | A         | A         | A         |
| Frequencies -- | 1390.9454 | 1411.9560 | 1468.6664 |
| Red. masses -- | 1.2272    | 1.2326    | 1.0474    |
| Frc consts --  | 1.3989    | 1.4479    | 1.3311    |
| IR Inten --    | 14.6518   | 1.9799    | 3.5360    |
|                | 31        | 32        | 33        |
|                | A         | A         | A         |
| Frequencies -- | 1475.5296 | 1739.1388 | 1771.3513 |
| Red. masses -- | 1.0434    | 10.1144   | 9.3076    |
| Frc consts --  | 1.3384    | 18.0242   | 17.2066   |
| IR Inten --    | 6.8416    | 102.0256  | 46.3996   |
|                | 34        | 35        | 36        |
|                | A         | A         | A         |
| Frequencies -- | 2992.7528 | 3079.5044 | 3099.2691 |
| Red. masses -- | 1.0895    | 1.0930    | 1.0298    |

|                |           |           |           |
|----------------|-----------|-----------|-----------|
| Frc consts --  | 5.7493    | 6.1069    | 5.8281    |
| IR Inten --    | 63.8398   | 7.5935    | 0.0253    |
|                | 37        | 38        | 39        |
|                | A         | A         | A         |
| Frequencies -- | 3213.9580 | 3221.6153 | 3337.8545 |
| Red. masses -- | 1.1062    | 1.1077    | 1.0687    |
| Frc consts --  | 6.7322    | 6.7735    | 7.0154    |
| IR Inten --    | 0.2923    | 0.2180    | 1183.6248 |

**MG-SA:**

|                |          |          |          |
|----------------|----------|----------|----------|
|                | 1        | 2        | 3        |
|                | A        | A        | A        |
| Frequencies -- | 35.3378  | 66.4879  | 82.1729  |
| Red. masses -- | 5.3300   | 8.5336   | 5.0797   |
| Frc consts --  | 0.0039   | 0.0222   | 0.0202   |
| IR Inten --    | 5.0259   | 0.8858   | 3.9803   |
|                | 4        | 5        | 6        |
|                | A        | A        | A        |
| Frequencies -- | 101.3415 | 118.7711 | 119.6181 |
| Red. masses -- | 3.3407   | 5.4465   | 4.8813   |
| Frc consts --  | 0.0202   | 0.0453   | 0.0412   |
| IR Inten --    | 0.6368   | 8.2415   | 16.9241  |
|                | 7        | 8        | 9        |
|                | A        | A        | A        |
| Frequencies -- | 147.8222 | 229.3938 | 313.6322 |
| Red. masses -- | 5.8858   | 1.0548   | 4.2451   |
| Frc consts --  | 0.0758   | 0.0327   | 0.2460   |
| IR Inten --    | 9.9286   | 0.1982   | 0.8453   |
|                | 10       | 11       | 12       |
|                | A        | A        | A        |
| Frequencies -- | 327.8492 | 362.6240 | 452.5123 |
| Red. masses -- | 3.8285   | 4.5731   | 6.5027   |
| Frc consts --  | 0.2425   | 0.3543   | 0.7845   |
| IR Inten --    | 5.9219   | 98.1014  | 4.6159   |
|                | 13       | 14       | 15       |
|                | A        | A        | A        |
| Frequencies -- | 489.1052 | 511.8891 | 573.7975 |
| Red. masses -- | 7.8261   | 7.3300   | 9.9167   |
| Frc consts --  | 1.1031   | 1.1316   | 1.9237   |
| IR Inten --    | 27.6393  | 29.8796  | 3.4266   |
|                | 16       | 17       | 18       |
|                | A        | A        | A        |
| Frequencies -- | 720.4146 | 734.9451 | 817.9718 |
| Red. masses -- | 3.4238   | 1.2908   | 7.5850   |
| Frc consts --  | 1.0469   | 0.4108   | 2.9901   |

|             |    |           |           |           |
|-------------|----|-----------|-----------|-----------|
| IR Inten    | -- | 35.6097   | 98.0020   | 209.6815  |
|             |    | 19        | 20        | 21        |
|             |    | A         | A         | A         |
| Frequencies | -- | 866.8136  | 1001.6082 | 1013.8782 |
| Red. masses | -- | 1.2298    | 1.3517    | 1.4239    |
| Frc consts  | -- | 0.5444    | 0.7990    | 0.8624    |
| IR Inten    | -- | 0.6449    | 2.5866    | 20.4700   |
|             |    | 22        | 23        | 24        |
|             |    | A         | A         | A         |
| Frequencies | -- | 1098.4823 | 1101.0450 | 1128.0081 |
| Red. masses | -- | 2.5560    | 2.5606    | 7.9783    |
| Frc consts  | -- | 1.8172    | 1.8289    | 5.9811    |
| IR Inten    | -- | 2.4630    | 4.2192    | 115.6574  |
|             |    | 25        | 26        | 27        |
|             |    | A         | A         | A         |
| Frequencies | -- | 1289.9046 | 1319.0769 | 1369.6839 |
| Red. masses | -- | 1.8947    | 2.4392    | 1.1881    |
| Frc consts  | -- | 1.8574    | 2.5006    | 1.3133    |
| IR Inten    | -- | 196.5469  | 247.0047  | 6.0469    |
|             |    | 28        | 29        | 30        |
|             |    | A         | A         | A         |
| Frequencies | -- | 1390.9454 | 1411.9560 | 1468.6664 |
| Red. masses | -- | 1.2272    | 1.2326    | 1.0474    |
| Frc consts  | -- | 1.3989    | 1.4479    | 1.3311    |
| IR Inten    | -- | 14.6518   | 1.9799    | 3.5360    |
|             |    | 31        | 32        | 33        |
|             |    | A         | A         | A         |
| Frequencies | -- | 1475.5296 | 1739.1388 | 1771.3513 |
| Red. masses | -- | 1.0434    | 10.1144   | 9.3076    |
| Frc consts  | -- | 1.3384    | 18.0242   | 17.2066   |
| IR Inten    | -- | 6.8416    | 102.0256  | 46.3996   |
|             |    | 34        | 35        | 36        |
|             |    | A         | A         | A         |
| Frequencies | -- | 2992.7528 | 3079.5044 | 3099.2691 |
| Red. masses | -- | 1.0895    | 1.0930    | 1.0298    |
| Frc consts  | -- | 5.7493    | 6.1069    | 5.8281    |
| IR Inten    | -- | 63.8398   | 7.5935    | 0.0253    |
|             |    | 37        | 38        | 39        |
|             |    | A         | A         | A         |
| Frequencies | -- | 3213.9580 | 3221.6153 | 3337.8545 |
| Red. masses | -- | 1.1062    | 1.1077    | 1.0687    |
| Frc consts  | -- | 6.7322    | 6.7735    | 7.0154    |
| IR Inten    | -- | 0.2923    | 0.2180    | 1183.6248 |

**MG-MSA:**

|                |          |          |          |
|----------------|----------|----------|----------|
|                | 1        | 2        | 3        |
|                | A        | A        | A        |
| Frequencies -- | 51.1372  | 59.5296  | 84.0610  |
| Red. masses -- | 3.8589   | 9.3443   | 6.4677   |
| Frc consts --  | 0.0059   | 0.0195   | 0.0269   |
| IR Inten --    | 8.7490   | 0.5929   | 3.7364   |
|                | 4        | 5        | 6        |
|                | A        | A        | A        |
| Frequencies -- | 95.1469  | 142.4086 | 155.1603 |
| Red. masses -- | 9.2396   | 5.2985   | 4.0838   |
| Frc consts --  | 0.0493   | 0.0633   | 0.0579   |
| IR Inten --    | 0.5301   | 0.6363   | 0.9718   |
|                | 7        | 8        | 9        |
|                | A        | A        | A        |
| Frequencies -- | 168.7463 | 204.2107 | 228.6825 |
| Red. masses -- | 1.1698   | 3.7396   | 1.0794   |
| Frc consts --  | 0.0196   | 0.0919   | 0.0333   |
| IR Inten --    | 2.5371   | 45.0067  | 1.7084   |
|                | 10       | 11       | 12       |
|                | A        | A        | A        |
| Frequencies -- | 263.6092 | 311.5653 | 331.8986 |
| Red. masses -- | 3.6664   | 4.2294   | 3.8726   |
| Frc consts --  | 0.1501   | 0.2419   | 0.2513   |
| IR Inten --    | 14.5120  | 0.1751   | 11.6194  |
|                | 13       | 14       | 15       |
|                | A        | A        | A        |
| Frequencies -- | 450.8275 | 471.2187 | 485.7349 |
| Red. masses -- | 6.3856   | 2.8463   | 7.3073   |
| Frc consts --  | 0.7647   | 0.3724   | 1.0158   |
| IR Inten --    | 4.1367   | 5.9785   | 28.6835  |
|                | 16       | 17       | 18       |
|                | A        | A        | A        |
| Frequencies -- | 502.5339 | 511.2297 | 581.1774 |
| Red. masses -- | 3.4333   | 7.5787   | 4.4827   |
| Frc consts --  | 0.5109   | 1.1670   | 0.8921   |
| IR Inten --    | 37.3571  | 20.0032  | 8.1071   |
|                | 19       | 20       | 21       |
|                | A        | A        | A        |
| Frequencies -- | 717.1183 | 760.5385 | 807.7907 |
| Red. masses -- | 6.7981   | 1.0988   | 3.7777   |
| Frc consts --  | 2.0598   | 0.3745   | 1.4524   |
| IR Inten --    | 33.3892  | 146.5271 | 13.5954  |
|                | 22       | 23       | 24       |
|                | A        | A        | A        |

|                |           |           |           |
|----------------|-----------|-----------|-----------|
| Frequencies -- | 812.5397  | 924.1987  | 1000.5633 |
| Red. masses -- | 7.6864    | 1.3549    | 1.3547    |
| Frc consts --  | 2.9899    | 0.6819    | 0.7990    |
| IR Inten --    | 194.4171  | 0.8615    | 2.2717    |
|                | 25        | 26        | 27        |
|                | A         | A         | A         |
| Frequencies -- | 1012.4106 | 1031.0711 | 1073.9351 |
| Red. masses -- | 1.4216    | 1.7295    | 1.9082    |
| Frc consts --  | 0.8585    | 1.0833    | 1.2967    |
| IR Inten --    | 16.9703   | 1.8800    | 4.4885    |
|                | 28        | 29        | 30        |
|                | A         | A         | A         |
| Frequencies -- | 1122.7460 | 1279.5654 | 1297.5408 |
| Red. masses -- | 8.1145    | 2.8717    | 2.1140    |
| Frc consts --  | 6.0267    | 2.7702    | 2.0970    |
| IR Inten --    | 120.2119  | 32.9070   | 183.6711  |
|                | 31        | 32        | 33        |
|                | A         | A         | A         |
| Frequencies -- | 1313.6692 | 1390.5189 | 1397.8464 |
| Red. masses -- | 2.2310    | 1.2263    | 1.2258    |
| Frc consts --  | 2.2684    | 1.3970    | 1.4111    |
| IR Inten --    | 281.3126  | 18.3964   | 3.3842    |
|                | 34        | 35        | 36        |
|                | A         | A         | A         |
| Frequencies -- | 1411.2546 | 1467.2093 | 1475.8963 |
| Red. masses -- | 1.3784    | 1.0472    | 1.0433    |
| Frc consts --  | 1.6174    | 1.3282    | 1.3389    |
| IR Inten --    | 36.6671   | 3.5644    | 6.5751    |
|                | 37        | 38        | 39        |
|                | A         | A         | A         |
| Frequencies -- | 1480.0414 | 1482.6575 | 1753.8300 |
| Red. masses -- | 1.0554    | 1.0655    | 10.3115   |
| Frc consts --  | 1.3621    | 1.3800    | 18.6873   |
| IR Inten --    | 18.0176   | 9.7058    | 153.3996  |
|                | 40        | 41        | 42        |
|                | A         | A         | A         |
| Frequencies -- | 1775.0574 | 3010.9109 | 3065.6403 |
| Red. masses -- | 10.1541   | 1.0897    | 1.0396    |
| Frc consts --  | 18.8502   | 5.8203    | 5.7566    |
| IR Inten --    | 42.6812   | 55.0652   | 0.8417    |
|                | 43        | 44        | 45        |
|                | A         | A         | A         |
| Frequencies -- | 3098.9616 | 3151.5271 | 3204.3011 |
| Red. masses -- | 1.0298    | 1.0926    | 1.1059    |



|                |           |           |           |
|----------------|-----------|-----------|-----------|
| Frc consts --  | 5.8266    | 6.3935    | 6.6903    |
| IR Inten --    | 0.0991    | 2.9310    | 1.5009    |
|                | 46        | 47        | 48        |
|                | A         | A         | A         |
| Frequencies -- | 3214.1412 | 3220.9960 | 3295.5425 |
| Red. masses -- | 1.1062    | 1.1077    | 1.0692    |
| Frc consts --  | 6.7332    | 6.7707    | 6.8414    |
| IR Inten --    | 0.4932    | 0.2074    | 954.8466  |

**FA-SA-W:**

|                |          |          |          |
|----------------|----------|----------|----------|
|                | 1        | 2        | 3        |
|                | A        | A        | A        |
| Frequencies -- | 86.1684  | 94.8110  | 133.8215 |
| Red. masses -- | 8.3908   | 6.4162   | 6.6757   |
| Frc consts --  | 0.0367   | 0.0340   | 0.0704   |
| IR Inten --    | 0.7799   | 1.3093   | 3.3178   |
|                | 4        | 5        | 6        |
|                | A        | A        | A        |
| Frequencies -- | 151.8019 | 205.7684 | 250.2443 |
| Red. masses -- | 5.1105   | 3.6968   | 4.1077   |
| Frc consts --  | 0.0694   | 0.0922   | 0.1516   |
| IR Inten --    | 0.0567   | 8.8662   | 40.5903  |
|                | 7        | 8        | 9        |
|                | A        | A        | A        |
| Frequencies -- | 342.6515 | 393.0671 | 464.3927 |
| Red. masses -- | 2.8340   | 8.1189   | 1.5746   |
| Frc consts --  | 0.1960   | 0.7391   | 0.2001   |
| IR Inten --    | 23.2197  | 14.5588  | 46.8114  |
|                | 10       | 11       | 12       |
|                | A        | A        | A        |
| Frequencies -- | 479.7423 | 512.0697 | 534.2477 |
| Red. masses -- | 2.2369   | 6.1893   | 14.3655  |
| Frc consts --  | 0.3033   | 0.9562   | 2.4158   |
| IR Inten --    | 55.2952  | 18.0962  | 24.7215  |
|                | 13       | 14       | 15       |
|                | A        | A        | A        |
| Frequencies -- | 544.3971 | 628.4376 | 765.5488 |
| Red. masses -- | 10.0090  | 1.5228   | 7.7252   |
| Frc consts --  | 1.7477   | 0.3543   | 2.6675   |
| IR Inten --    | 38.1258  | 128.5357 | 105.2558 |
|                | 16       | 17       | 18       |
|                | A        | A        | A        |
| Frequencies -- | 798.0692 | 872.8894 | 957.6212 |
| Red. masses -- | 1.1788   | 13.3421  | 4.9185   |
| Frc consts --  | 0.4424   | 5.9895   | 2.6575   |

|                  |    |           |           |           |
|------------------|----|-----------|-----------|-----------|
| IR Inten         | -- | 145.5744  | 233.5111  | 136.8327  |
|                  |    | 19        | 20        | 21        |
|                  |    | A         | A         | A         |
| Frequencies      | -- | 1031.2442 | 1127.7894 | 1146.6384 |
| Red. masses      | -- | 1.2421    | 1.4189    | 3.3223    |
| Frc consts       | -- | 0.7783    | 1.0633    | 2.5736    |
| IR Inten         | -- | 18.0867   | 28.6475   | 305.3436  |
|                  |    | 22        | 23        | 24        |
|                  |    | A         | A         | A         |
| Frequencies      | -- | 1155.2079 | 1168.1377 | 1265.6359 |
| Red. masses      | -- | 3.7943    | 1.4918    | 1.0879    |
| Frc consts       | -- | 2.9833    | 1.1994    | 1.0267    |
| IR Inten         | -- | 137.6582  | 91.2694   | 27.6282   |
|                  |    | 25        | 26        | 27        |
|                  |    | A         | A         | A         |
| Frequencies      | -- | 1343.7339 | 1385.5665 | 1436.1117 |
| Red. masses      | -- | 2.6180    | 1.2986    | 1.3516    |
| Frc consts       | -- | 2.7852    | 1.4689    | 1.6424    |
| IR Inten         | -- | 215.2866  | 118.1359  | 149.6770  |
|                  |    | 28        | 29        | 30        |
|                  |    | A         | A         | A         |
| Frequencies      | -- | 1469.1989 | 1491.3417 | 1555.8546 |
| Red. masses      | -- | 1.2295    | 1.1729    | 1.0983    |
| Frc consts       | -- | 1.5636    | 1.5369    | 1.5664    |
| IR Inten         | -- | 34.0594   | 42.9441   | 1.9724    |
|                  |    | 31        | 32        | 33        |
|                  |    | A         | A         | A         |
| Frequencies      | -- | 2843.7316 | 3092.0976 | 3162.3253 |
| Red. masses      | -- | 1.0795    | 1.0558    | 1.1158    |
| Frc consts       | -- | 5.1432    | 5.9477    | 6.5743    |
| IR Inten         | -- | 1842.0382 | 33.3779   | 29.2026   |
|                  |    | 34        | 35        | 36        |
|                  |    | A         | A         | A         |
| Frequencies      | -- | 3635.4816 | 3713.9097 | 3742.0581 |
| Red. masses      | -- | 1.0660    | 1.0661    | 1.0658    |
| Frc consts       | -- | 8.3007    | 8.6639    | 8.7930    |
| IR Inten         | -- | 422.4999  | 126.4908  | 64.2843   |
| <b>FA-MSA-W:</b> |    |           |           |           |
|                  |    | 1         | 2         | 3         |
|                  |    | A         | A         | A         |
| Frequencies      | -- | 84.5893   | 97.9134   | 120.6618  |
| Red. masses      | -- | 7.0307    | 6.3622    | 6.7286    |
| Frc consts       | -- | 0.0296    | 0.0359    | 0.0577    |
| IR Inten         | -- | 4.8251    | 0.7879    | 6.2569    |

|                |           |           |           |
|----------------|-----------|-----------|-----------|
|                | 4         | 5         | 6         |
|                | A         | A         | A         |
| Frequencies -- | 144.0602  | 193.9651  | 222.5565  |
| Red. masses -- | 3.6690    | 3.3036    | 1.0543    |
| Frc consts --  | 0.0449    | 0.0732    | 0.0308    |
| IR Inten --    | 0.4626    | 2.5777    | 0.2037    |
|                | 7         | 8         | 9         |
|                | A         | A         | A         |
| Frequencies -- | 238.1312  | 318.1264  | 347.6429  |
| Red. masses -- | 3.3282    | 4.3349    | 4.3299    |
| Frc consts --  | 0.1112    | 0.2585    | 0.3083    |
| IR Inten --    | 31.4374   | 2.1984    | 38.5045   |
|                | 10        | 11        | 12        |
|                | A         | A         | A         |
| Frequencies -- | 462.8768  | 484.0384  | 493.9686  |
| Red. masses -- | 6.1627    | 2.6332    | 8.7446    |
| Frc consts --  | 0.7780    | 0.3635    | 1.2571    |
| IR Inten --    | 6.4673    | 43.7490   | 17.0474   |
|                | 13        | 14        | 15        |
|                | A         | A         | A         |
| Frequencies -- | 511.9736  | 625.5322  | 729.0278  |
| Red. masses -- | 6.6488    | 1.4692    | 5.7357    |
| Frc consts --  | 1.0268    | 0.3387    | 1.7961    |
| IR Inten --    | 27.7407   | 125.9605  | 23.6049   |
|                | 16        | 17        | 18        |
|                | A         | A         | A         |
| Frequencies -- | 836.7147  | 847.7005  | 949.0723  |
| Red. masses -- | 1.4942    | 2.6987    | 2.3425    |
| Frc consts --  | 0.6163    | 1.1426    | 1.2431    |
| IR Inten --    | 141.9754  | 142.1205  | 46.2923   |
|                | 19        | 20        | 21        |
|                | A         | A         | A         |
| Frequencies -- | 998.3758  | 1002.6525 | 1015.9708 |
| Red. masses -- | 1.4814    | 1.3390    | 1.5882    |
| Frc consts --  | 0.8700    | 0.7931    | 0.9659    |
| IR Inten --    | 95.6033   | 7.2510    | 27.1386   |
|                | 22        | 23        | 24        |
|                | A         | A         | A         |
| Frequencies -- | 1098.4267 | 1117.9453 | 1154.4671 |
| Red. masses -- | 1.2844    | 8.3487    | 4.2587    |
| Frc consts --  | 0.9130    | 6.1477    | 3.3442    |
| IR Inten --    | 76.1012   | 159.5674  | 171.2474  |
|                | 25        | 26        | 27        |
|                | A         | A         | A         |

|                |           |           |           |
|----------------|-----------|-----------|-----------|
| Frequencies -- | 1260.8981 | 1292.0454 | 1367.0026 |
| Red. masses -- | 1.3308    | 4.2425    | 1.1603    |
| Frc consts --  | 1.2466    | 4.1728    | 1.2775    |
| IR Inten --    | 34.5764   | 311.1846  | 114.6161  |
|                | 28        | 29        | 30        |
|                | A         | A         | A         |
| Frequencies -- | 1385.1942 | 1404.8108 | 1468.7807 |
| Red. masses -- | 1.2090    | 1.1835    | 1.0509    |
| Frc consts --  | 1.3668    | 1.3761    | 1.3358    |
| IR Inten --    | 18.7450   | 51.5520   | 8.3131    |
|                | 31        | 32        | 33        |
|                | A         | A         | A         |
| Frequencies -- | 1471.9921 | 1477.0600 | 1496.9324 |
| Red. masses -- | 1.1784    | 1.0433    | 1.1656    |
| Frc consts --  | 1.5044    | 1.3411    | 1.5389    |
| IR Inten --    | 12.0109   | 4.8392    | 51.7209   |
|                | 34        | 35        | 36        |
|                | A         | A         | A         |
| Frequencies -- | 1557.4167 | 2946.0578 | 3082.1865 |
| Red. masses -- | 1.1000    | 1.0741    | 1.0563    |
| Frc consts --  | 1.5721    | 5.4926    | 5.9125    |
| IR Inten --    | 3.4602    | 1580.6380 | 36.2487   |
|                | 37        | 38        | 39        |
|                | A         | A         | A         |
| Frequencies -- | 3099.9101 | 3150.7848 | 3215.7685 |
| Red. masses -- | 1.0297    | 1.1147    | 1.1062    |
| Frc consts --  | 5.8301    | 6.5199    | 6.7401    |
| IR Inten --    | 0.0035    | 36.1285   | 0.6051    |
|                | 40        | 41        | 42        |
|                | A         | A         | A         |
| Frequencies -- | 3221.9614 | 3576.4384 | 3736.7963 |
| Red. masses -- | 1.1076    | 1.0670    | 1.0658    |
| Frc consts --  | 6.7747    | 8.0408    | 8.7682    |
| IR Inten --    | 0.3899    | 552.2782  | 62.7726   |

**GL-SA-W:**

|                |          |          |          |
|----------------|----------|----------|----------|
|                | 1        | 2        | 3        |
|                | A        | A        | A        |
| Frequencies -- | 65.3576  | 88.2929  | 91.2510  |
| Red. masses -- | 8.5958   | 5.4654   | 9.2927   |
| Frc consts --  | 0.0216   | 0.0251   | 0.0456   |
| IR Inten --    | 2.2118   | 3.6462   | 6.1051   |
|                | 4        | 5        | 6        |
|                | A        | A        | A        |
| Frequencies -- | 108.2175 | 124.6867 | 166.2608 |

|                |           |           |           |
|----------------|-----------|-----------|-----------|
| Red. masses -- | 8.5752    | 8.4202    | 6.0343    |
| Frc consts --  | 0.0592    | 0.0771    | 0.0983    |
| IR Inten --    | 4.6050    | 1.9102    | 5.6749    |
|                | 7         | 8         | 9         |
|                | A         | A         | A         |
| Frequencies -- | 193.8176  | 339.3778  | 354.8473  |
| Red. masses -- | 6.1956    | 2.9392    | 5.6230    |
| Frc consts --  | 0.1371    | 0.1995    | 0.4172    |
| IR Inten --    | 24.9521   | 18.8748   | 4.6514    |
|                | 10        | 11        | 12        |
|                | A         | A         | A         |
| Frequencies -- | 390.4703  | 413.0316  | 469.5301  |
| Red. masses -- | 6.2261    | 3.3423    | 1.6163    |
| Frc consts --  | 0.5593    | 0.3359    | 0.2099    |
| IR Inten --    | 5.1299    | 3.4510    | 67.6571   |
|                | 13        | 14        | 15        |
|                | A         | A         | A         |
| Frequencies -- | 510.0719  | 531.1185  | 540.8308  |
| Red. masses -- | 5.5165    | 7.6017    | 12.7988   |
| Frc consts --  | 0.8456    | 1.2634    | 2.2057    |
| IR Inten --    | 22.7165   | 57.3264   | 36.3163   |
|                | 16        | 17        | 18        |
|                | A         | A         | A         |
| Frequencies -- | 551.2906  | 621.6431  | 740.2431  |
| Red. masses -- | 6.3228    | 1.2058    | 1.6902    |
| Frc consts --  | 1.1322    | 0.2745    | 0.5457    |
| IR Inten --    | 19.1107   | 87.5460   | 71.6469   |
|                | 19        | 20        | 21        |
|                | A         | A         | A         |
| Frequencies -- | 746.8000  | 778.6734  | 845.0555  |
| Red. masses -- | 1.9634    | 7.1206    | 3.3001    |
| Frc consts --  | 0.6451    | 2.5438    | 1.3885    |
| IR Inten --    | 109.2321  | 106.0505  | 122.0667  |
|                | 22        | 23        | 24        |
|                | A         | A         | A         |
| Frequencies -- | 879.1860  | 948.2465  | 1018.9137 |
| Red. masses -- | 7.7332    | 1.1072    | 1.9846    |
| Frc consts --  | 3.5219    | 0.5866    | 1.2140    |
| IR Inten --    | 212.5518  | 97.2172   | 62.4634   |
|                | 25        | 26        | 27        |
|                | A         | A         | A         |
| Frequencies -- | 1090.5200 | 1131.5816 | 1153.7384 |
| Red. masses -- | 4.3618    | 4.7017    | 4.6794    |
| Frc consts --  | 3.0562    | 3.5471    | 3.6699    |

|                |           |           |           |
|----------------|-----------|-----------|-----------|
| IR Inten --    | 15.5309   | 53.9021   | 358.4851  |
|                | 28        | 29        | 30        |
|                | A         | A         | A         |
| Frequencies -- | 1174.4865 | 1267.7969 | 1325.8532 |
| Red. masses -- | 1.4133    | 1.3334    | 1.1108    |
| Frc consts --  | 1.1486    | 1.2628    | 1.1505    |
| IR Inten --    | 63.0652   | 77.4260   | 18.2882   |
|                | 31        | 32        | 33        |
|                | A         | A         | A         |
| Frequencies -- | 1349.3242 | 1400.9304 | 1422.9381 |
| Red. masses -- | 3.6670    | 1.1828    | 1.1763    |
| Frc consts --  | 3.9336    | 1.3677    | 1.4033    |
| IR Inten --    | 274.6390  | 17.9177   | 14.4790   |
|                | 34        | 35        | 36        |
|                | A         | A         | A         |
| Frequencies -- | 1473.4172 | 1514.2505 | 1786.0077 |
| Red. masses -- | 1.2193    | 1.5307    | 10.2044   |
| Frc consts --  | 1.5596    | 2.0679    | 19.1780   |
| IR Inten --    | 172.6453  | 49.4177   | 83.6634   |
|                | 37        | 38        | 39        |
|                | A         | A         | A         |
| Frequencies -- | 2985.5977 | 3035.9797 | 3092.9752 |
| Red. masses -- | 1.0767    | 1.0897    | 1.0858    |
| Frc consts --  | 5.6545    | 5.9177    | 6.1200    |
| IR Inten --    | 1786.4034 | 32.6505   | 17.0489   |
|                | 40        | 41        | 42        |
|                | A         | A         | A         |
| Frequencies -- | 3614.6262 | 3622.6880 | 3711.8682 |
| Red. masses -- | 1.0663    | 1.0651    | 1.0661    |
| Frc consts --  | 8.2081    | 8.2356    | 8.6542    |
| IR Inten --    | 625.8090  | 28.3855   | 129.7650  |

**GL-MSA-W:**

|                |          |          |          |
|----------------|----------|----------|----------|
|                | 1        | 2        | 3        |
|                | A        | A        | A        |
| Frequencies -- | 58.2610  | 83.0343  | 87.3513  |
| Red. masses -- | 7.6917   | 5.9897   | 7.7157   |
| Frc consts --  | 0.0154   | 0.0243   | 0.0347   |
| IR Inten --    | 2.0148   | 1.8121   | 3.4994   |
|                | 4        | 5        | 6        |
|                | A        | A        | A        |
| Frequencies -- | 103.4144 | 121.9797 | 148.5392 |
| Red. masses -- | 7.4543   | 5.9969   | 6.0884   |
| Frc consts --  | 0.0470   | 0.0526   | 0.0791   |
| IR Inten --    | 6.4137   | 7.0203   | 18.2244  |

|                |           |           |           |
|----------------|-----------|-----------|-----------|
|                | 7         | 8         | 9         |
|                | A         | A         | A         |
| Frequencies -- | 175.0516  | 228.5132  | 320.0336  |
| Red. masses -- | 3.6718    | 1.0501    | 4.0264    |
| Frc consts --  | 0.0663    | 0.0323    | 0.2430    |
| IR Inten --    | 6.5033    | 0.6974    | 8.2777    |
|                | 10        | 11        | 12        |
|                | A         | A         | A         |
| Frequencies -- | 325.7964  | 352.4932  | 409.6528  |
| Red. masses -- | 4.2589    | 3.9367    | 3.2362    |
| Frc consts --  | 0.2663    | 0.2882    | 0.3200    |
| IR Inten --    | 9.5937    | 4.9696    | 3.8916    |
|                | 13        | 14        | 15        |
|                | A         | A         | A         |
| Frequencies -- | 461.8648  | 491.7236  | 509.9108  |
| Red. masses -- | 6.7058    | 7.6522    | 3.9609    |
| Frc consts --  | 0.8428    | 1.0901    | 0.6068    |
| IR Inten --    | 10.4374   | 33.8699   | 47.6854   |
|                | 16        | 17        | 18        |
|                | A         | A         | A         |
| Frequencies -- | 524.9688  | 557.9892  | 728.4824  |
| Red. masses -- | 1.9001    | 3.3337    | 5.3845    |
| Frc consts --  | 0.3085    | 0.6115    | 1.6836    |
| IR Inten --    | 33.2969   | 61.2112   | 27.0894   |
|                | 19        | 20        | 21        |
|                | A         | A         | A         |
| Frequencies -- | 749.6714  | 825.7369  | 832.9213  |
| Red. masses -- | 3.5825    | 1.3122    | 4.2482    |
| Frc consts --  | 1.1862    | 0.5272    | 1.7365    |
| IR Inten --    | 50.0689   | 54.8371   | 141.8607  |
|                | 22        | 23        | 24        |
|                | A         | A         | A         |
| Frequencies -- | 859.4784  | 913.7375  | 1002.7237 |
| Red. masses -- | 2.5279    | 1.1312    | 1.3649    |
| Frc consts --  | 1.1002    | 0.5565    | 0.8085    |
| IR Inten --    | 133.6675  | 94.8855   | 2.8612    |
|                | 25        | 26        | 27        |
|                | A         | A         | A         |
| Frequencies -- | 1013.4716 | 1024.3246 | 1091.4459 |
| Red. masses -- | 1.5294    | 1.8182    | 5.4226    |
| Frc consts --  | 0.9255    | 1.1240    | 3.8059    |
| IR Inten --    | 24.6616   | 55.4817   | 14.5884   |
|                | 28        | 29        | 30        |
|                | A         | A         | A         |

|                |           |           |           |
|----------------|-----------|-----------|-----------|
| Frequencies -- | 1115.6983 | 1142.3637 | 1279.0384 |
| Red. masses -- | 4.3103    | 5.5523    | 1.6879    |
| Frc consts --  | 3.1612    | 4.2691    | 1.6269    |
| IR Inten --    | 144.3660  | 200.6582  | 94.3017   |
|                | 31        | 32        | 33        |
|                | A         | A         | A         |
| Frequencies -- | 1292.3314 | 1330.8984 | 1359.5756 |
| Red. masses -- | 3.7989    | 1.1419    | 1.1466    |
| Frc consts --  | 3.7382    | 1.1917    | 1.2488    |
| IR Inten --    | 200.4484  | 89.1502   | 96.9129   |
|                | 34        | 35        | 36        |
|                | A         | A         | A         |
| Frequencies -- | 1393.9271 | 1405.9947 | 1445.7973 |
| Red. masses -- | 1.2184    | 1.1870    | 1.1209    |
| Frc consts --  | 1.3949    | 1.3825    | 1.3805    |
| IR Inten --    | 28.5595   | 10.5814   | 51.8021   |
|                | 37        | 38        | 39        |
|                | A         | A         | A         |
| Frequencies -- | 1468.8700 | 1476.0270 | 1512.8414 |
| Red. masses -- | 1.0466    | 1.0433    | 1.5030    |
| Frc consts --  | 1.3305    | 1.3392    | 2.0267    |
| IR Inten --    | 3.9883    | 5.9943    | 48.4620   |
|                | 40        | 41        | 42        |
|                | A         | A         | A         |
| Frequencies -- | 1789.4499 | 3020.0696 | 3083.2826 |
| Red. masses -- | 10.2623   | 1.0893    | 1.0807    |
| Frc consts --  | 19.3612   | 5.8538    | 6.0531    |
| IR Inten --    | 89.2324   | 76.8444   | 425.4197  |
|                | 43        | 44        | 45        |
|                | A         | A         | A         |
| Frequencies -- | 3096.6657 | 3099.7513 | 3214.7362 |
| Red. masses -- | 1.0757    | 1.0316    | 1.1062    |
| Frc consts --  | 6.0777    | 5.8398    | 6.7357    |
| IR Inten --    | 1109.9266 | 46.5958   | 0.7458    |
|                | 46        | 47        | 48        |
|                | A         | A         | A         |
| Frequencies -- | 3222.1665 | 3548.2620 | 3677.7418 |
| Red. masses -- | 1.1077    | 1.0670    | 1.0651    |
| Frc consts --  | 6.7757    | 7.9152    | 8.4881    |
| IR Inten --    | 0.4045    | 790.9470  | 82.7905   |

**MG-SA-W:**

|                |         |         |         |
|----------------|---------|---------|---------|
|                | 1       | 2       | 3       |
|                | A       | A       | A       |
| Frequencies -- | 58.6410 | 72.9235 | 91.5468 |



|                |          |          |          |
|----------------|----------|----------|----------|
| Red. masses -- | 4.7875   | 6.6125   | 8.1451   |
| Frc consts --  | 0.0097   | 0.0207   | 0.0402   |
| IR Inten --    | 1.3364   | 3.3855   | 5.0876   |
|                | 4        | 5        | 6        |
|                | A        | A        | A        |
| Frequencies -- | 101.9191 | 108.2777 | 138.1833 |
| Red. masses -- | 7.5326   | 5.5801   | 5.1547   |
| Frc consts --  | 0.0461   | 0.0385   | 0.0580   |
| IR Inten --    | 1.6655   | 4.6449   | 0.5205   |
|                | 7        | 8        | 9        |
|                | A        | A        | A        |
| Frequencies -- | 162.1962 | 187.3190 | 291.3487 |
| Red. masses -- | 1.2225   | 9.7009   | 4.1907   |
| Frc consts --  | 0.0189   | 0.2006   | 0.2096   |
| IR Inten --    | 0.3163   | 31.8086  | 0.7188   |
|                | 10       | 11       | 12       |
|                | A        | A        | A        |
| Frequencies -- | 337.9974 | 345.8072 | 389.6197 |
| Red. masses -- | 2.9813   | 3.6767   | 6.5052   |
| Frc consts --  | 0.2007   | 0.2590   | 0.5818   |
| IR Inten --    | 18.6315  | 3.7352   | 5.3788   |
|                | 13       | 14       | 15       |
|                | A        | A        | A        |
| Frequencies -- | 426.4982 | 468.6293 | 509.2649 |
| Red. masses -- | 4.2516   | 1.6425   | 5.7981   |
| Frc consts --  | 0.4557   | 0.2125   | 0.8860   |
| IR Inten --    | 1.8632   | 69.5749  | 18.3994  |
|                | 16       | 17       | 18       |
|                | A        | A        | A        |
| Frequencies -- | 531.8634 | 538.0746 | 543.0943 |
| Red. masses -- | 8.6132   | 7.2191   | 7.4631   |
| Frc consts --  | 1.4355   | 1.2315   | 1.2969   |
| IR Inten --    | 42.7268  | 46.1500  | 18.1487  |
|                | 19       | 20       | 21       |
|                | A        | A        | A        |
| Frequencies -- | 586.7823 | 659.4907 | 681.6127 |
| Red. masses -- | 3.8669   | 2.1059   | 1.5001   |
| Frc consts --  | 0.7845   | 0.5396   | 0.4106   |
| IR Inten --    | 21.1851  | 22.5014  | 80.2222  |
|                | 22       | 23       | 24       |
|                | A        | A        | A        |
| Frequencies -- | 739.5389 | 777.9327 | 819.5565 |
| Red. masses -- | 1.1959   | 7.3162   | 2.4632   |
| Frc consts --  | 0.3854   | 2.6087   | 0.9748   |

|                |           |           |           |
|----------------|-----------|-----------|-----------|
| IR Inten --    | 150.8310  | 109.9728  | 19.9145   |
|                | 25        | 26        | 27        |
|                | A         | A         | A         |
| Frequencies -- | 877.3149  | 964.5150  | 982.7969  |
| Red. masses -- | 11.9417   | 1.1154    | 2.2575    |
| Frc consts --  | 5.4153    | 0.6113    | 1.2847    |
| IR Inten --    | 262.0559  | 91.5271   | 40.7385   |
|                | 28        | 29        | 30        |
|                | A         | A         | A         |
| Frequencies -- | 1046.4161 | 1067.9144 | 1126.9524 |
| Red. masses -- | 1.8253    | 3.9561    | 6.4289    |
| Frc consts --  | 1.1776    | 2.6582    | 4.8106    |
| IR Inten --    | 26.2163   | 81.3190   | 42.5282   |
|                | 31        | 32        | 33        |
|                | A         | A         | A         |
| Frequencies -- | 1152.2849 | 1174.6775 | 1223.2621 |
| Red. masses -- | 5.1255    | 1.4000    | 1.5920    |
| Frc consts --  | 4.0097    | 1.1382    | 1.4036    |
| IR Inten --    | 370.1318  | 63.2110   | 7.8744    |
|                | 34        | 35        | 36        |
|                | A         | A         | A         |
| Frequencies -- | 1277.7779 | 1330.4815 | 1349.2557 |
| Red. masses -- | 1.6863    | 1.1158    | 3.8959    |
| Frc consts --  | 1.6221    | 1.1638    | 4.1787    |
| IR Inten --    | 152.5776  | 14.2740   | 263.3392  |
|                | 37        | 38        | 39        |
|                | A         | A         | A         |
| Frequencies -- | 1409.7415 | 1420.1597 | 1476.2899 |
| Red. masses -- | 1.3243    | 1.1794    | 1.2121    |
| Frc consts --  | 1.5506    | 1.4015    | 1.5565    |
| IR Inten --    | 39.5119   | 13.6749   | 162.7561  |
|                | 40        | 41        | 42        |
|                | A         | A         | A         |
| Frequencies -- | 1486.8366 | 1489.2082 | 1519.9349 |
| Red. masses -- | 1.0632    | 1.0550    | 1.5344    |
| Frc consts --  | 1.3848    | 1.3785    | 2.0886    |
| IR Inten --    | 22.9012   | 19.9750   | 49.5888   |
|                | 43        | 44        | 45        |
|                | A         | A         | A         |
| Frequencies -- | 1781.9977 | 2936.5546 | 3068.2821 |
| Red. masses -- | 10.4480   | 1.0776    | 1.0368    |
| Frc consts --  | 19.5477   | 5.4749    | 5.7508    |
| IR Inten --    | 91.6076   | 1963.7295 | 0.4221    |
|                | 46        | 47        | 48        |

|                |           |           |           |
|----------------|-----------|-----------|-----------|
|                | A         | A         | A         |
| Frequencies -- | 3088.2699 | 3148.3307 | 3196.8286 |
| Red. masses -- | 1.0849    | 1.0981    | 1.1044    |
| Frc consts --  | 6.0962    | 6.4132    | 6.6501    |
| IR Inten --    | 16.5598   | 1.9613    | 4.0183    |
|                | 49        | 50        | 51        |
|                | A         | A         | A         |
| Frequencies -- | 3560.4191 | 3613.3177 | 3713.1027 |
| Red. masses -- | 1.0646    | 1.0665    | 1.0661    |
| Frc consts --  | 7.9516    | 8.2037    | 8.6599    |
| IR Inten --    | 163.5490  | 550.7053  | 128.8614  |

**MG-MSA-W:**

|                |          |          |          |
|----------------|----------|----------|----------|
|                | 1        | 2        | 3        |
| A              | A        | A        |          |
| Frequencies -- | 55.5941  | 70.0381  | 85.1823  |
| Red. masses -- | 4.9627   | 5.4283   | 7.4400   |
| Frc consts --  | 0.0090   | 0.0157   | 0.0318   |
| IR Inten --    | 1.6181   | 1.2092   | 3.6202   |
|                | 4        | 5        | 6        |
| A              | A        | A        |          |
| Frequencies -- | 92.0456  | 107.2856 | 137.9170 |
| Red. masses -- | 6.3853   | 5.5250   | 4.6957   |
| Frc consts --  | 0.0319   | 0.0375   | 0.0526   |
| IR Inten --    | 3.3650   | 5.4861   | 1.1340   |
|                | 7        | 8        | 9        |
| A              | A        | A        |          |
| Frequencies -- | 151.2541 | 158.5515 | 229.5896 |
| Red. masses -- | 5.2386   | 1.1843   | 1.0538   |
| Frc consts --  | 0.0706   | 0.0175   | 0.0327   |
| IR Inten --    | 24.1336  | 1.0088   | 0.7116   |
|                | 10       | 11       | 12       |
| A              | A        | A        |          |
| Frequencies -- | 286.1927 | 322.7572 | 337.5574 |
| Red. masses -- | 3.8865   | 4.1998   | 3.8123   |
| Frc consts --  | 0.1876   | 0.2578   | 0.2559   |
| IR Inten --    | 1.3503   | 3.0598   | 4.7270   |
|                | 13       | 14       | 15       |
| A              | A        | A        |          |
| Frequencies -- | 346.3401 | 411.5695 | 460.8506 |
| Red. masses -- | 4.7740   | 3.3159   | 7.0430   |
| Frc consts --  | 0.3374   | 0.3309   | 0.8813   |
| IR Inten --    | 16.0011  | 2.2227   | 8.7760   |
|                | 16       | 17       | 18       |
| A              | A        | A        |          |

|                |           |           |           |
|----------------|-----------|-----------|-----------|
| Frequencies -- | 492.7088  | 513.4034  | 540.7971  |
| Red. masses -- | 8.5889    | 6.5722    | 4.5300    |
| Frc consts --  | 1.2285    | 1.0207    | 0.7806    |
| IR Inten --    | 25.0781   | 44.4535   | 6.8313    |
|                | 19        | 20        | 21        |
|                | A         | A         | A         |
| Frequencies -- | 587.6922  | 592.7637  | 669.8724  |
| Red. masses -- | 2.0503    | 1.7613    | 3.5214    |
| Frc consts --  | 0.4172    | 0.3646    | 0.9310    |
| IR Inten --    | 24.5375   | 83.5129   | 22.9798   |
|                | 22        | 23        | 24        |
|                | A         | A         | A         |
| Frequencies -- | 730.4992  | 812.1649  | 827.7891  |
| Red. masses -- | 5.2675    | 1.8515    | 1.5749    |
| Frc consts --  | 1.6561    | 0.7196    | 0.6358    |
| IR Inten --    | 36.0799   | 25.7906   | 77.0079   |
|                | 25        | 26        | 27        |
|                | A         | A         | A         |
| Frequencies -- | 849.5105  | 911.8733  | 982.8129  |
| Red. masses -- | 3.5283    | 1.1286    | 2.1728    |
| Frc consts --  | 1.5002    | 0.5529    | 1.2365    |
| IR Inten --    | 185.5190  | 92.3001   | 44.0364   |
|                | 28        | 29        | 30        |
|                | A         | A         | A         |
| Frequencies -- | 1002.4909 | 1015.8179 | 1046.6552 |
| Red. masses -- | 1.3689    | 1.4295    | 1.8463    |
| Frc consts --  | 0.8105    | 0.8691    | 1.1917    |
| IR Inten --    | 3.5348    | 23.0972   | 20.4636   |
|                | 31        | 32        | 33        |
|                | A         | A         | A         |
| Frequencies -- | 1076.3209 | 1109.8318 | 1138.6310 |
| Red. masses -- | 4.3938    | 6.7482    | 6.5977    |
| Frc consts --  | 2.9990    | 4.8972    | 5.0397    |
| IR Inten --    | 52.5509   | 159.7531  | 213.4110  |
|                | 34        | 35        | 36        |
|                | A         | A         | A         |
| Frequencies -- | 1219.0547 | 1282.3367 | 1295.8747 |
| Red. masses -- | 1.6617    | 2.6983    | 2.8600    |
| Frc consts --  | 1.4550    | 2.6143    | 2.8298    |
| IR Inten --    | 14.6737   | 213.9214  | 133.6390  |
|                | 37        | 38        | 39        |
|                | A         | A         | A         |
| Frequencies -- | 1336.3971 | 1369.4369 | 1394.9151 |
| Red. masses -- | 1.1293    | 1.1487    | 1.2067    |

|                 |           |           |           |
|-----------------|-----------|-----------|-----------|
| Frc consts --   | 1.1883    | 1.2692    | 1.3834    |
| IR Inten --     | 71.2560   | 75.9926   | 32.6955   |
|                 | 40        | 41        | 42        |
|                 | A         | A         | A         |
| Frequencies --  | 1408.7137 | 1440.9627 | 1469.2603 |
| Red. masses --  | 1.3632    | 1.1166    | 1.0467    |
| Frc consts --   | 1.5939    | 1.3660    | 1.3313    |
| IR Inten --     | 56.4367   | 48.9693   | 4.0507    |
|                 | 43        | 44        | 45        |
|                 | A         | A         | A         |
| Frequencies --  | 1475.9874 | 1488.1210 | 1489.4655 |
| Red. masses --  | 1.0434    | 1.0619    | 1.0521    |
| Frc consts --   | 1.3393    | 1.3855    | 1.3753    |
| IR Inten --     | 5.8746    | 19.6020   | 14.5806   |
|                 | 46        | 47        | 48        |
|                 | A         | A         | A         |
| Frequencies --  | 1519.7981 | 1783.6674 | 3054.5964 |
| Red. masses --  | 1.5193    | 10.5673   | 1.0734    |
| Frc consts --   | 2.0676    | 19.8081   | 5.9011    |
| IR Inten --     | 45.6106   | 95.2994   | 1730.6234 |
|                 | 49        | 50        | 51        |
|                 | A         | A         | A         |
| Frequencies --  | 3067.2852 | 3082.5962 | 3099.4850 |
| Red. masses --  | 1.0372    | 1.0846    | 1.0298    |
| Frc consts --   | 5.7492    | 6.0724    | 5.8287    |
| IR Inten --     | 1.1504    | 70.7610   | 0.2661    |
|                 | 52        | 53        | 54        |
|                 | A         | A         | A         |
| Frequencies --  | 3147.9513 | 3195.5205 | 3214.4340 |
| Red. masses --  | 1.0981    | 1.1044    | 1.1062    |
| Frc consts --   | 6.4114    | 6.6445    | 6.7344    |
| IR Inten --     | 2.4384    | 4.6476    | 0.5560    |
|                 | 55        | 56        | 57        |
|                 | A         | A         | A         |
| Frequencies --  | 3221.9994 | 3550.3413 | 3614.2839 |
| Red. masses --  | 1.1076    | 1.0672    | 1.0646    |
| Frc consts --   | 6.7748    | 7.9260    | 8.1940    |
| IR Inten --     | 0.3110    | 840.1364  | 97.7226   |
| <b>FA-SA-A:</b> |           |           |           |
|                 | 1         | 2         | 3         |
|                 | A         | A         | A         |
| Frequencies --  | 83.3261   | 95.1607   | 130.5600  |
| Red. masses --  | 8.3188    | 5.1504    | 8.4205    |
| Frc consts --   | 0.0340    | 0.0275    | 0.0846    |

|             |    |           |           |           |
|-------------|----|-----------|-----------|-----------|
| IR Inten    | -- | 4.9521    | 13.9004   | 5.2420    |
|             |    | 4         | 5         | 6         |
|             |    | A         | A         | A         |
| Frequencies | -- | 190.2245  | 222.4035  | 282.1812  |
| Red. masses | -- | 2.8107    | 4.7346    | 3.3575    |
| Frc consts  | -- | 0.0599    | 0.1380    | 0.1575    |
| IR Inten    | -- | 9.6611    | 15.9390   | 86.5587   |
|             |    | 7         | 8         | 9         |
|             |    | A         | A         | A         |
| Frequencies | -- | 337.9498  | 384.1974  | 424.1416  |
| Red. masses | -- | 1.6243    | 8.7594    | 1.6043    |
| Frc consts  | -- | 0.1093    | 0.7618    | 0.1700    |
| IR Inten    | -- | 125.3178  | 2.7284    | 10.7877   |
|             |    | 10        | 11        | 12        |
|             |    | A         | A         | A         |
| Frequencies | -- | 453.4678  | 511.7129  | 539.3924  |
| Red. masses | -- | 2.4967    | 1.8553    | 9.8823    |
| Frc consts  | -- | 0.3025    | 0.2862    | 1.6940    |
| IR Inten    | -- | 29.4542   | 23.8085   | 20.2861   |
|             |    | 13        | 14        | 15        |
|             |    | A         | A         | A         |
| Frequencies | -- | 565.2870  | 584.1442  | 749.5052  |
| Red. masses | -- | 9.3553    | 11.8344   | 16.9561   |
| Frc consts  | -- | 1.7613    | 2.3792    | 5.6121    |
| IR Inten    | -- | 35.9111   | 90.4202   | 224.2720  |
|             |    | 16        | 17        | 18        |
|             |    | A         | A         | A         |
| Frequencies | -- | 834.6838  | 953.9305  | 965.0826  |
| Red. masses | -- | 3.1370    | 1.0895    | 1.1041    |
| Frc consts  | -- | 1.2877    | 0.5841    | 0.6059    |
| IR Inten    | -- | 10.5852   | 93.4200   | 26.3668   |
|             |    | 19        | 20        | 21        |
|             |    | A         | A         | A         |
| Frequencies | -- | 987.4969  | 1068.5363 | 1087.3967 |
| Red. masses | -- | 11.8891   | 4.4306    | 2.2926    |
| Frc consts  | -- | 6.8308    | 2.9805    | 1.5972    |
| IR Inten    | -- | 348.4544  | 134.6868  | 234.5396  |
|             |    | 22        | 23        | 24        |
|             |    | A         | A         | A         |
| Frequencies | -- | 1160.2083 | 1185.4366 | 1245.1888 |
| Red. masses | -- | 1.3868    | 1.2937    | 2.8181    |
| Frc consts  | -- | 1.0998    | 1.0711    | 2.5744    |
| IR Inten    | -- | 127.6783  | 30.6339   | 98.0831   |
|             |    | 25        | 26        | 27        |

|                |           |           |           |
|----------------|-----------|-----------|-----------|
|                | A         | A         | A         |
| Frequencies -- | 1286.1674 | 1346.0626 | 1457.1826 |
| Red. masses -- | 6.2723    | 1.1320    | 1.2050    |
| Frc consts --  | 6.1132    | 1.2085    | 1.5075    |
| IR Inten --    | 526.1407  | 9.4293    | 22.0143   |
|                | 28        | 29        | 30        |
|                | A         | A         | A         |
| Frequencies -- | 1527.0273 | 1548.8351 | 1576.2254 |
| Red. masses -- | 1.1836    | 1.1039    | 1.1349    |
| Frc consts --  | 1.6262    | 1.5602    | 1.6612    |
| IR Inten --    | 49.4801   | 16.3887   | 92.9947   |
|                | 31        | 32        | 33        |
|                | A         | A         | A         |
| Frequencies -- | 1656.3740 | 1708.8092 | 2206.8788 |
| Red. masses -- | 1.0339    | 1.0460    | 1.1359    |
| Frc consts --  | 1.6712    | 1.7995    | 3.2593    |
| IR Inten --    | 8.7842    | 25.4038   | 2310.3511 |
|                | 34        | 35        | 36        |
|                | A         | A         | A         |
| Frequencies -- | 3093.0096 | 3168.4355 | 3292.1608 |
| Red. masses -- | 1.0566    | 1.1150    | 1.0685    |
| Frc consts --  | 5.9554    | 6.5951    | 6.8231    |
| IR Inten --    | 54.1760   | 25.8676   | 1047.0706 |
|                | 37        | 38        | 39        |
|                | A         | A         | A         |
| Frequencies -- | 3464.1402 | 3556.0694 | 3735.4882 |
| Red. masses -- | 1.0513    | 1.0940    | 1.0660    |
| Frc consts --  | 7.4333    | 8.1509    | 8.7638    |
| IR Inten --    | 48.2204   | 55.9559   | 103.1558  |

**FA-MSA-A:**

|                |          |          |          |   |
|----------------|----------|----------|----------|---|
|                |          | 1        | 2        | 3 |
|                | A        | A        | A        |   |
| Frequencies -- | 62.0068  | 89.4747  | 94.2218  |   |
| Red. masses -- | 4.4752   | 6.2006   | 4.8753   |   |
| Frc consts --  | 0.0101   | 0.0292   | 0.0255   |   |
| IR Inten --    | 243.7355 | 5.1550   | 13.5188  |   |
|                | 4        | 5        | 6        |   |
|                | A        | A        | A        |   |
| Frequencies -- | 139.2588 | 207.5282 | 230.2916 |   |
| Red. masses -- | 5.4239   | 3.3936   | 1.0789   |   |
| Frc consts --  | 0.0620   | 0.0861   | 0.0337   |   |
| IR Inten --    | 5.0263   | 48.0120  | 7.2236   |   |
|                | 7        | 8        | 9        |   |
|                | A        | A        | A        |   |

|                |           |           |           |
|----------------|-----------|-----------|-----------|
| Frequencies -- | 235.0752  | 297.7503  | 328.9279  |
| Red. masses -- | 2.1632    | 3.3782    | 4.2953    |
| Frc consts --  | 0.0704    | 0.1765    | 0.2738    |
| IR Inten --    | 132.1891  | 32.0831   | 19.4921   |
|                | 10        | 11        | 12        |
|                | A         | A         | A         |
| Frequencies -- | 411.7616  | 471.8895  | 498.2108  |
| Red. masses -- | 1.4539    | 6.5754    | 10.0698   |
| Frc consts --  | 0.1452    | 0.8627    | 1.4726    |
| IR Inten --    | 7.4917    | 11.3585   | 14.0584   |
|                | 13        | 14        | 15        |
|                | A         | A         | A         |
| Frequencies -- | 515.3962  | 540.5786  | 747.9898  |
| Red. masses -- | 5.7118    | 2.3778    | 6.4579    |
| Frc consts --  | 0.8939    | 0.4094    | 2.1288    |
| IR Inten --    | 14.5806   | 0.2588    | 31.2855   |
|                | 16        | 17        | 18        |
|                | A         | A         | A         |
| Frequencies -- | 770.6552  | 887.1085  | 933.7904  |
| Red. masses -- | 1.0765    | 8.0756    | 2.6100    |
| Frc consts --  | 0.3767    | 3.7444    | 1.3409    |
| IR Inten --    | 92.0334   | 279.6448  | 33.5144   |
|                | 19        | 20        | 21        |
|                | A         | A         | A         |
| Frequencies -- | 990.8368  | 999.0141  | 1002.9191 |
| Red. masses -- | 1.1889    | 1.3570    | 1.4186    |
| Frc consts --  | 0.6877    | 0.7979    | 0.8407    |
| IR Inten --    | 43.1361   | 3.2146    | 144.5940  |
|                | 22        | 23        | 24        |
|                | A         | A         | A         |
| Frequencies -- | 1057.2923 | 1105.1776 | 1170.0610 |
| Red. masses -- | 3.0542    | 4.6634    | 1.7008    |
| Frc consts --  | 2.0116    | 3.3559    | 1.3719    |
| IR Inten --    | 42.8827   | 222.9834  | 83.3060   |
|                | 25        | 26        | 27        |
|                | A         | A         | A         |
| Frequencies -- | 1223.5905 | 1263.2206 | 1325.0891 |
| Red. masses -- | 1.9287    | 5.3154    | 1.1241    |
| Frc consts --  | 1.7013    | 4.9974    | 1.1629    |
| IR Inten --    | 10.3257   | 270.0370  | 102.7649  |
|                | 28        | 29        | 30        |
|                | A         | A         | A         |
| Frequencies -- | 1356.4142 | 1384.6142 | 1456.5797 |
| Red. masses -- | 1.1172    | 1.2212    | 1.1983    |



|                 |           |           |           |
|-----------------|-----------|-----------|-----------|
| Frc consts --   | 1.2111    | 1.3794    | 1.4979    |
| IR Inten --     | 53.3499   | 0.7747    | 330.3280  |
|                 | 31        | 32        | 33        |
|                 | A         | A         | A         |
| Frequencies --  | 1469.1550 | 1476.7363 | 1507.9453 |
| Red. masses --  | 1.0457    | 1.0499    | 1.1621    |
| Frc consts --   | 1.3298    | 1.3489    | 1.5570    |
| IR Inten --     | 5.3415    | 5.8577    | 70.3243   |
|                 | 34        | 35        | 36        |
|                 | A         | A         | A         |
| Frequencies --  | 1560.0787 | 1571.4310 | 1608.2159 |
| Red. masses --  | 1.1140    | 1.1482    | 1.0694    |
| Frc consts --   | 1.5974    | 1.6705    | 1.6296    |
| IR Inten --     | 122.3999  | 618.8465  | 13.1544   |
|                 | 37        | 38        | 39        |
|                 | A         | A         | A         |
| Frequencies --  | 1671.3195 | 3063.0430 | 3098.4323 |
| Red. masses --  | 1.1403    | 1.0569    | 1.0298    |
| Frc consts --   | 1.8767    | 5.8423    | 5.8251    |
| IR Inten --     | 2456.3200 | 37.2993   | 0.1269    |
|                 | 40        | 41        | 42        |
|                 | A         | A         | A         |
| Frequencies --  | 3124.0857 | 3213.3829 | 3219.7450 |
| Red. masses --  | 1.1131    | 1.1062    | 1.1074    |
| Frc consts --   | 6.4008    | 6.7296    | 6.7637    |
| IR Inten --     | 27.7042   | 0.0967    | 0.0411    |
|                 | 43        | 44        | 45        |
|                 | A         | A         | A         |
| Frequencies --  | 3477.4044 | 3547.5218 | 3576.9038 |
| Red. masses --  | 1.0503    | 1.0679    | 1.0931    |
| Frc consts --   | 7.4831    | 7.9184    | 8.2402    |
| IR Inten --     | 6.1996    | 551.1431  | 21.1435   |
| <b>GL-SA-A:</b> |           |           |           |
|                 | 1         | 2         | 3         |
|                 | A         | A         | A         |
| Frequencies --  | 60.9586   | 82.2504   | 100.7675  |
| Red. masses --  | 9.2261    | 5.7552    | 9.2497    |
| Frc consts --   | 0.0202    | 0.0229    | 0.0553    |
| IR Inten --     | 8.9775    | 8.5675    | 3.7722    |
|                 | 4         | 5         | 6         |
|                 | A         | A         | A         |
| Frequencies --  | 120.8008  | 136.2753  | 187.0987  |
| Red. masses --  | 4.2042    | 4.4834    | 6.7525    |
| Frc consts --   | 0.0361    | 0.0491    | 0.1393    |

|             |    |           |           |           |
|-------------|----|-----------|-----------|-----------|
| IR Inten    | -- | 7.9493    | 8.6292    | 15.9558   |
|             |    | 7         | 8         | 9         |
|             |    | A         | A         | A         |
| Frequencies | -- | 223.1336  | 310.6429  | 343.5694  |
| Red. masses | -- | 8.4315    | 3.9308    | 2.1267    |
| Frc consts  | -- | 0.2473    | 0.2235    | 0.1479    |
| IR Inten    | -- | 19.5061   | 107.9178  | 67.0292   |
|             |    | 10        | 11        | 12        |
|             |    | A         | A         | A         |
| Frequencies | -- | 394.8686  | 411.3334  | 432.1506  |
| Red. masses | -- | 2.7601    | 2.1165    | 2.4220    |
| Frc consts  | -- | 0.2536    | 0.2110    | 0.2665    |
| IR Inten    | -- | 11.4070   | 2.6031    | 36.7022   |
|             |    | 13        | 14        | 15        |
|             |    | A         | A         | A         |
| Frequencies | -- | 454.2516  | 493.5872  | 532.7402  |
| Red. masses | -- | 1.8202    | 2.7108    | 8.7812    |
| Frc consts  | -- | 0.2213    | 0.3891    | 1.4684    |
| IR Inten    | -- | 48.5192   | 3.3624    | 6.0559    |
|             |    | 16        | 17        | 18        |
|             |    | A         | A         | A         |
| Frequencies | -- | 563.0624  | 574.3825  | 650.4490  |
| Red. masses | -- | 12.5760   | 13.4027   | 3.7911    |
| Frc consts  | -- | 2.3491    | 2.6052    | 0.9450    |
| IR Inten    | -- | 22.1834   | 121.5131  | 5.6370    |
|             |    | 19        | 20        | 21        |
|             |    | A         | A         | A         |
| Frequencies | -- | 715.2335  | 788.4885  | 951.2618  |
| Red. masses | -- | 15.2666   | 3.3856    | 1.1093    |
| Frc consts  | -- | 4.6014    | 1.2402    | 0.5914    |
| IR Inten    | -- | 226.9004  | 9.0557    | 63.7728   |
|             |    | 22        | 23        | 24        |
|             |    | A         | A         | A         |
| Frequencies | -- | 975.9918  | 987.9526  | 1045.1350 |
| Red. masses | -- | 1.6899    | 9.6451    | 1.9345    |
| Frc consts  | -- | 0.9484    | 5.5467    | 1.2450    |
| IR Inten    | -- | 3.2144    | 200.5925  | 90.2199   |
|             |    | 25        | 26        | 27        |
|             |    | A         | A         | A         |
| Frequencies | -- | 1075.2552 | 1122.2500 | 1155.9227 |
| Red. masses | -- | 4.0868    | 2.8990    | 1.3343    |
| Frc consts  | -- | 2.7839    | 2.1512    | 1.0504    |
| IR Inten    | -- | 88.6676   | 172.8589  | 52.0467   |
|             |    | 28        | 29        | 30        |

|                |           |           |           |
|----------------|-----------|-----------|-----------|
|                | A         | A         | A         |
| Frequencies -- | 1167.6510 | 1256.8099 | 1294.1706 |
| Red. masses -- | 1.5510    | 2.0707    | 7.1669    |
| Frc consts --  | 1.2459    | 1.9271    | 7.0724    |
| IR Inten --    | 136.6092  | 92.5223   | 557.4862  |
|                | 31        | 32        | 33        |
|                | A         | A         | A         |
| Frequencies -- | 1374.2360 | 1395.3669 | 1427.9183 |
| Red. masses -- | 1.2745    | 1.2784    | 1.2271    |
| Frc consts --  | 1.4181    | 1.4665    | 1.4742    |
| IR Inten --    | 36.2542   | 11.2614   | 47.5032   |
|                | 34        | 35        | 36        |
|                | A         | A         | A         |
| Frequencies -- | 1537.4630 | 1569.4187 | 1645.0587 |
| Red. masses -- | 1.2480    | 1.1902    | 1.0669    |
| Frc consts --  | 1.7380    | 1.7272    | 1.7012    |
| IR Inten --    | 55.0579   | 122.5237  | 29.5076   |
|                | 37        | 38        | 39        |
|                | A         | A         | A         |
| Frequencies -- | 1691.2321 | 1787.9224 | 2420.9399 |
| Red. masses -- | 1.0447    | 9.2284    | 1.1116    |
| Frc consts --  | 1.7606    | 17.3810   | 3.8387    |
| IR Inten --    | 27.1550   | 77.1045   | 1841.6059 |
|                | 40        | 41        | 42        |
|                | A         | A         | A         |
| Frequencies -- | 3029.1473 | 3063.1994 | 3198.3738 |
| Red. masses -- | 1.0901    | 1.0847    | 1.0699    |
| Frc consts --  | 5.8931    | 5.9969    | 6.4482    |
| IR Inten --    | 34.1345   | 35.8280   | 1298.2449 |
|                | 43        | 44        | 45        |
|                | A         | A         | A         |
| Frequencies -- | 3454.8395 | 3539.1057 | 3733.7115 |
| Red. masses -- | 1.0525    | 1.0927    | 1.0660    |
| Frc consts --  | 7.4019    | 8.0638    | 8.7557    |
| IR Inten --    | 71.8906   | 71.8125   | 98.0686   |

**GL-MSA-A:**

|                |         |         |          |
|----------------|---------|---------|----------|
|                | 1       | 2       | 3        |
|                | A       | A       | A        |
| Frequencies -- | 81.1860 | 94.6272 | 114.5327 |
| Red. masses -- | 6.0981  | 9.3228  | 6.7535   |
| Frc consts --  | 0.0237  | 0.0492  | 0.0522   |
| IR Inten --    | 2.9700  | 1.7946  | 2.5795   |
|                | 4       | 5       | 6        |
|                | A       | A       | A        |

|                |           |           |           |
|----------------|-----------|-----------|-----------|
| Frequencies -- | 146.9108  | 155.7127  | 198.3768  |
| Red. masses -- | 6.3389    | 5.4854    | 3.4068    |
| Frc consts --  | 0.0806    | 0.0784    | 0.0790    |
| IR Inten --    | 4.4295    | 14.2517   | 16.6389   |
|                | 7         | 8         | 9         |
|                | A         | A         | A         |
| Frequencies -- | 237.8701  | 260.1784  | 281.7108  |
| Red. masses -- | 2.6900    | 1.2448    | 3.1087    |
| Frc consts --  | 0.0897    | 0.0496    | 0.1454    |
| IR Inten --    | 55.7165   | 10.5232   | 17.2264   |
|                | 10        | 11        | 12        |
|                | A         | A         | A         |
| Frequencies -- | 310.2288  | 338.7952  | 381.6710  |
| Red. masses -- | 4.0403    | 4.1424    | 2.1996    |
| Frc consts --  | 0.2291    | 0.2801    | 0.1888    |
| IR Inten --    | 0.0714    | 4.1184    | 7.8530    |
|                | 13        | 14        | 15        |
|                | A         | A         | A         |
| Frequencies -- | 454.3187  | 474.4496  | 498.1736  |
| Red. masses -- | 3.1321    | 2.9856    | 8.0658    |
| Frc consts --  | 0.3809    | 0.3960    | 1.1794    |
| IR Inten --    | 19.1219   | 7.7464    | 26.3802   |
|                | 16        | 17        | 18        |
|                | A         | A         | A         |
| Frequencies -- | 515.1738  | 568.1993  | 628.2416  |
| Red. masses -- | 7.2939    | 2.7212    | 3.2866    |
| Frc consts --  | 1.1406    | 0.5176    | 0.7643    |
| IR Inten --    | 41.7850   | 5.6328    | 9.7759    |
|                | 19        | 20        | 21        |
|                | A         | A         | A         |
| Frequencies -- | 742.0296  | 805.1135  | 827.9429  |
| Red. masses -- | 6.2747    | 1.2676    | 2.5519    |
| Frc consts --  | 2.0356    | 0.4841    | 1.0307    |
| IR Inten --    | 23.8037   | 64.7156   | 17.1472   |
|                | 22        | 23        | 24        |
|                | A         | A         | A         |
| Frequencies -- | 881.9906  | 992.0550  | 1003.4264 |
| Red. masses -- | 5.7639    | 1.3019    | 1.4318    |
| Frc consts --  | 2.6417    | 0.7549    | 0.8494    |
| IR Inten --    | 239.2129  | 54.0302   | 15.3865   |
|                | 25        | 26        | 27        |
|                | A         | A         | A         |
| Frequencies -- | 1017.2805 | 1034.8129 | 1080.4054 |
| Red. masses -- | 1.3923    | 1.8323    | 4.0212    |

|                |           |           |           |
|----------------|-----------|-----------|-----------|
| Frc consts --  | 0.8489    | 1.1560    | 2.7655    |
| IR Inten --    | 19.7666   | 16.6120   | 91.4943   |
|                | 28        | 29        | 30        |
|                | A         | A         | A         |
| Frequencies -- | 1113.7719 | 1142.6819 | 1197.8661 |
| Red. masses -- | 3.5477    | 1.9342    | 1.6155    |
| Frc consts --  | 2.5929    | 1.4880    | 1.3658    |
| IR Inten --    | 152.4375  | 36.4600   | 188.7148  |
|                | 31        | 32        | 33        |
|                | A         | A         | A         |
| Frequencies -- | 1256.7746 | 1295.9270 | 1350.6306 |
| Red. masses -- | 1.1408    | 10.1350   | 1.3002    |
| Frc consts --  | 1.0617    | 10.0284   | 1.3974    |
| IR Inten --    | 4.6596    | 399.9027  | 3.0277    |
|                | 34        | 35        | 36        |
|                | A         | A         | A         |
| Frequencies -- | 1389.2358 | 1391.4076 | 1415.6352 |
| Red. masses -- | 1.3417    | 1.2796    | 1.3293    |
| Frc consts --  | 1.5257    | 1.4596    | 1.5696    |
| IR Inten --    | 9.7862    | 11.7667   | 2.2732    |
|                | 37        | 38        | 39        |
|                | A         | A         | A         |
| Frequencies -- | 1472.6116 | 1476.4293 | 1495.6673 |
| Red. masses -- | 1.0435    | 1.0449    | 1.1549    |
| Frc consts --  | 1.3333    | 1.3420    | 1.5222    |
| IR Inten --    | 3.9817    | 5.3092    | 67.7680   |
|                | 40        | 41        | 42        |
|                | A         | A         | A         |
| Frequencies -- | 1523.3341 | 1602.0216 | 1780.5591 |
| Red. masses -- | 1.1345    | 1.1073    | 9.7291    |
| Frc consts --  | 1.5511    | 1.6744    | 18.1735   |
| IR Inten --    | 53.1286   | 64.8564   | 72.9957   |
|                | 43        | 44        | 45        |
|                | A         | A         | A         |
| Frequencies -- | 2268.5448 | 3014.5157 | 3032.4833 |
| Red. masses -- | 1.1080    | 1.0890    | 1.0832    |
| Frc consts --  | 3.3595    | 5.8306    | 5.8686    |
| IR Inten --    | 2751.2969 | 40.0656   | 35.8564   |
|                | 46        | 47        | 48        |
|                | A         | A         | A         |
| Frequencies -- | 3092.5191 | 3207.4237 | 3213.8883 |
| Red. masses -- | 1.0298    | 1.1062    | 1.1073    |
| Frc consts --  | 5.8025    | 6.7047    | 6.7387    |
| IR Inten --    | 1.2480    | 0.9804    | 0.8611    |

|                |           |           |           |
|----------------|-----------|-----------|-----------|
|                | 49        | 50        | 51        |
|                | A         | A         | A         |
| Frequencies -- | 3493.3707 | 3551.3519 | 3597.2061 |
| Red. masses -- | 1.0501    | 1.0665    | 1.0935    |
| Frc consts --  | 7.5501    | 7.9252    | 8.3371    |
| IR Inten --    | 9.5487    | 485.1055  | 28.6112   |

**MG-SA-A:**

|                |         |         |         |
|----------------|---------|---------|---------|
|                | 1       | 2       | 3       |
|                | A       | A       | A       |
| Frequencies -- | 61.3704 | 70.6864 | 83.0646 |
| Red. masses -- | 5.4339  | 5.6062  | 6.3155  |
| Frc consts --  | 0.0121  | 0.0165  | 0.0257  |
| IR Inten --    | 5.2764  | 4.1253  | 9.1554  |

|                |          |          |          |
|----------------|----------|----------|----------|
|                | 4        | 5        | 6        |
|                | A        | A        | A        |
| Frequencies -- | 100.9995 | 122.9125 | 173.4726 |
| Red. masses -- | 9.3529   | 5.2344   | 3.4469   |
| Frc consts --  | 0.0562   | 0.0466   | 0.0611   |
| IR Inten --    | 3.0499   | 9.2534   | 6.0832   |

|                |          |          |          |
|----------------|----------|----------|----------|
|                | 7        | 8        | 9        |
|                | A        | A        | A        |
| Frequencies -- | 182.3142 | 215.9025 | 277.1788 |
| Red. masses -- | 1.2394   | 9.6125   | 3.6442   |
| Frc consts --  | 0.0243   | 0.2640   | 0.1650   |
| IR Inten --    | 0.8582   | 45.0918  | 36.2352  |

|                |          |          |          |
|----------------|----------|----------|----------|
|                | 10       | 11       | 12       |
|                | A        | A        | A        |
| Frequencies -- | 335.5614 | 374.3352 | 391.8845 |
| Red. masses -- | 2.2637   | 3.0429   | 2.3400   |
| Frc consts --  | 0.1502   | 0.2512   | 0.2117   |
| IR Inten --    | 14.3105  | 113.8123 | 3.5719   |

|                |          |          |          |
|----------------|----------|----------|----------|
|                | 13       | 14       | 15       |
|                | A        | A        | A        |
| Frequencies -- | 400.6965 | 419.9260 | 451.7221 |
| Red. masses -- | 2.2298   | 2.2607   | 1.8826   |
| Frc consts --  | 0.2109   | 0.2349   | 0.2263   |
| IR Inten --    | 9.7771   | 18.9934  | 41.8114  |

|                |          |          |          |
|----------------|----------|----------|----------|
|                | 16       | 17       | 18       |
|                | A        | A        | A        |
| Frequencies -- | 474.9990 | 531.4257 | 549.1480 |
| Red. masses -- | 3.1557   | 9.3987   | 5.5522   |
| Frc consts --  | 0.4195   | 1.5639   | 0.9865   |
| IR Inten --    | 5.4445   | 5.8885   | 10.1081  |

|  |    |    |    |
|--|----|----|----|
|  | 19 | 20 | 21 |
|--|----|----|----|

|                |           |           |           |
|----------------|-----------|-----------|-----------|
|                | A         | A         | A         |
| Frequencies -- | 568.2918  | 572.3910  | 636.7675  |
| Red. masses -- | 9.1309    | 13.3548   | 2.9320    |
| Frc consts --  | 1.7374    | 2.5779    | 0.7004    |
| IR Inten --    | 17.2676   | 119.5944  | 6.5902    |
|                | 22        | 23        | 24        |
|                | A         | A         | A         |
| Frequencies -- | 713.7190  | 784.9704  | 895.9600  |
| Red. masses -- | 16.6691   | 2.6288    | 3.1386    |
| Frc consts --  | 5.0028    | 0.9544    | 1.4845    |
| IR Inten --    | 226.4842  | 9.3191    | 3.1966    |
|                | 25        | 26        | 27        |
|                | A         | A         | A         |
| Frequencies -- | 947.8202  | 989.4819  | 1001.6327 |
| Red. masses -- | 1.0914    | 9.7916    | 1.6584    |
| Frc consts --  | 0.5777    | 5.6483    | 0.9803    |
| IR Inten --    | 58.9208   | 168.3734  | 21.4115   |
|                | 28        | 29        | 30        |
|                | A         | A         | A         |
| Frequencies -- | 1040.8531 | 1075.2429 | 1113.2204 |
| Red. masses -- | 1.6411    | 3.3480    | 2.7138    |
| Frc consts --  | 1.0475    | 2.2806    | 1.9815    |
| IR Inten --    | 25.8412   | 51.1214   | 273.8464  |
|                | 31        | 32        | 33        |
|                | A         | A         | A         |
| Frequencies -- | 1151.5467 | 1163.2231 | 1226.0887 |
| Red. masses -- | 1.3520    | 1.5358    | 2.8825    |
| Frc consts --  | 1.0563    | 1.2244    | 2.5530    |
| IR Inten --    | 68.2556   | 128.7904  | 120.3118  |
|                | 34        | 35        | 36        |
|                | A         | A         | A         |
| Frequencies -- | 1271.8818 | 1292.4141 | 1377.5890 |
| Red. masses -- | 1.9702    | 6.8394    | 1.4110    |
| Frc consts --  | 1.8778    | 6.7309    | 1.5777    |
| IR Inten --    | 38.0589   | 548.7847  | 34.2633   |
|                | 37        | 38        | 39        |
|                | A         | A         | A         |
| Frequencies -- | 1410.9232 | 1423.8705 | 1480.2714 |
| Red. masses -- | 1.3053    | 1.2759    | 1.0556    |
| Frc consts --  | 1.5310    | 1.5240    | 1.3628    |
| IR Inten --    | 62.3746   | 11.0417   | 25.3456   |
|                | 40        | 41        | 42        |
|                | A         | A         | A         |
| Frequencies -- | 1486.7192 | 1533.7116 | 1564.2448 |

|                  |           |           |           |
|------------------|-----------|-----------|-----------|
| Red. masses --   | 1.0513    | 1.2193    | 1.2272    |
| Frc consts --    | 1.3691    | 1.6898    | 1.7692    |
| IR Inten --      | 14.9243   | 75.9888   | 101.5727  |
|                  | 43        | 44        | 45        |
|                  | A         | A         | A         |
| Frequencies --   | 1642.6493 | 1692.8174 | 1780.9712 |
| Red. masses --   | 1.0611    | 1.0439    | 9.8237    |
| Frc consts --    | 1.6870    | 1.7624    | 18.3586   |
| IR Inten --      | 18.1471   | 23.1348   | 88.6740   |
|                  | 46        | 47        | 48        |
|                  | A         | A         | A         |
| Frequencies --   | 2521.7457 | 3069.7997 | 3071.8005 |
| Red. masses --   | 1.1033    | 1.0544    | 1.0659    |
| Frc consts --    | 4.1337    | 5.8541    | 5.9260    |
| IR Inten --      | 1709.6407 | 16.2787   | 23.7236   |
|                  | 49        | 50        | 51        |
|                  | A         | A         | A         |
| Frequencies --   | 3148.1515 | 3193.5690 | 3201.6896 |
| Red. masses --   | 1.0975    | 1.0718    | 1.1033    |
| Frc consts --    | 6.4087    | 6.4406    | 6.6632    |
| IR Inten --      | 0.5472    | 1318.7613 | 40.7198   |
|                  | 52        | 53        | 54        |
|                  | A         | A         | A         |
| Frequencies --   | 3451.7659 | 3537.2961 | 3735.7186 |
| Red. masses --   | 1.0534    | 1.0919    | 1.0660    |
| Frc consts --    | 7.3951    | 8.0496    | 8.7652    |
| IR Inten --      | 78.5463   | 71.0484   | 95.8870   |
| <b>FA-SA-MA:</b> |           |           |           |
|                  | 1         | 2         | 3         |
|                  | A         | A         | A         |
| Frequencies --   | 79.2109   | 84.1892   | 111.6283  |
| Red. masses --   | 5.8695    | 8.3758    | 5.3771    |
| Frc consts --    | 0.0217    | 0.0350    | 0.0395    |
| IR Inten --      | 6.5225    | 1.2494    | 7.9874    |
|                  | 4         | 5         | 6         |
|                  | A         | A         | A         |
| Frequencies --   | 135.0350  | 179.1524  | 206.9884  |
| Red. masses --   | 2.8219    | 1.9411    | 1.6055    |
| Frc consts --    | 0.0303    | 0.0367    | 0.0405    |
| IR Inten --      | 1.8971    | 1.5789    | 17.9303   |
|                  | 7         | 8         | 9         |
|                  | A         | A         | A         |
| Frequencies --   | 228.3829  | 275.7475  | 299.1373  |
| Red. masses --   | 4.1036    | 2.6549    | 2.3545    |



|                |           |           |           |
|----------------|-----------|-----------|-----------|
| Frc consts --  | 0.1261    | 0.1189    | 0.1241    |
| IR Inten --    | 4.5257    | 19.5362   | 32.1641   |
|                | 10        | 11        | 12        |
|                | A         | A         | A         |
| Frequencies -- | 325.9885  | 385.3354  | 446.8578  |
| Red. masses -- | 1.6096    | 11.3681   | 2.9331    |
| Frc consts --  | 0.1008    | 0.9945    | 0.3451    |
| IR Inten --    | 132.7429  | 4.1772    | 27.8295   |
|                | 13        | 14        | 15        |
|                | A         | A         | A         |
| Frequencies -- | 471.7485  | 539.4237  | 560.4006  |
| Red. masses -- | 4.7550    | 10.2746   | 12.4933   |
| Frc consts --  | 0.6235    | 1.7615    | 2.3117    |
| IR Inten --    | 2.2943    | 25.6347   | 56.8267   |
|                | 16        | 17        | 18        |
|                | A         | A         | A         |
| Frequencies -- | 579.3795  | 747.9665  | 882.1727  |
| Red. masses -- | 14.6915   | 16.8036   | 3.0739    |
| Frc consts --  | 2.9057    | 5.5388    | 1.4094    |
| IR Inten --    | 67.7883   | 229.0203  | 25.6795   |
|                | 19        | 20        | 21        |
|                | A         | A         | A         |
| Frequencies -- | 900.9585  | 940.2912  | 995.9175  |
| Red. masses -- | 1.0805    | 1.0886    | 13.7299   |
| Frc consts --  | 0.5168    | 0.5671    | 8.0235    |
| IR Inten --    | 45.8654   | 96.0093   | 284.3810  |
|                | 22        | 23        | 24        |
|                | A         | A         | A         |
| Frequencies -- | 1025.8192 | 1067.2159 | 1088.1685 |
| Red. masses -- | 1.4805    | 2.5852    | 4.6986    |
| Frc consts --  | 0.9179    | 1.7348    | 3.2780    |
| IR Inten --    | 7.5481    | 64.0035   | 277.4153  |
|                | 25        | 26        | 27        |
|                | A         | A         | A         |
| Frequencies -- | 1156.4400 | 1164.1770 | 1205.1869 |
| Red. masses -- | 1.4933    | 2.2016    | 1.3116    |
| Frc consts --  | 1.1767    | 1.7580    | 1.1224    |
| IR Inten --    | 149.4853  | 52.8212   | 43.6533   |
|                | 28        | 29        | 30        |
|                | A         | A         | A         |
| Frequencies -- | 1231.2406 | 1278.8299 | 1331.4435 |
| Red. masses -- | 2.6467    | 5.9677    | 1.2457    |
| Frc consts --  | 2.3639    | 5.7502    | 1.3011    |
| IR Inten --    | 67.3205   | 497.3263  | 3.7105    |

|                   |           |           |           |
|-------------------|-----------|-----------|-----------|
|                   | 31        | 32        | 33        |
|                   | A         | A         | A         |
| Frequencies --    | 1393.4800 | 1452.0057 | 1477.9326 |
| Red. masses --    | 1.2177    | 1.1744    | 1.1816    |
| Frc consts --     | 1.3931    | 1.4588    | 1.5207    |
| IR Inten --       | 11.0060   | 24.8481   | 2.9553    |
|                   | 34        | 35        | 36        |
|                   | A         | A         | A         |
| Frequencies --    | 1518.6330 | 1520.4315 | 1524.5765 |
| Red. masses --    | 1.1402    | 1.0464    | 1.0577    |
| Frc consts --     | 1.5493    | 1.4252    | 1.4485    |
| IR Inten --       | 59.9092   | 8.3095    | 11.0859   |
|                   | 37        | 38        | 39        |
|                   | A         | A         | A         |
| Frequencies --    | 1545.4882 | 1619.5504 | 1661.8575 |
| Red. masses --    | 1.1029    | 1.1133    | 1.0605    |
| Frc consts --     | 1.5520    | 1.7205    | 1.7256    |
| IR Inten --       | 19.2267   | 22.0064   | 38.5574   |
|                   | 40        | 41        | 42        |
|                   | A         | A         | A         |
| Frequencies --    | 2478.8121 | 3083.9894 | 3096.0213 |
| Red. masses --    | 1.1099    | 1.0554    | 1.0324    |
| Frc consts --     | 4.0181    | 5.9142    | 5.8306    |
| IR Inten --       | 1972.2273 | 42.9250   | 8.4739    |
|                   | 43        | 44        | 45        |
|                   | A         | A         | A         |
| Frequencies --    | 3158.2782 | 3198.0492 | 3209.4837 |
| Red. masses --    | 1.1147    | 1.1071    | 1.1067    |
| Frc consts --     | 6.5511    | 6.6715    | 6.7164    |
| IR Inten --       | 19.2606   | 3.2394    | 1.0475    |
|                   | 46        | 47        | 48        |
|                   | A         | A         | A         |
| Frequencies --    | 3310.8663 | 3508.0777 | 3750.2967 |
| Red. masses --    | 1.0683    | 1.0756    | 1.0660    |
| Frc consts --     | 6.8995    | 7.7991    | 8.8337    |
| IR Inten --       | 1012.9790 | 45.7380   | 103.2002  |
| <b>FA-MSA-MA:</b> |           |           |           |
|                   | 1         | 2         | 3         |
|                   | A         | A         | A         |
| Frequencies --    | 99.5291   | 107.5880  | 126.1285  |
| Red. masses --    | 6.5351    | 5.8018    | 6.4490    |
| Frc consts --     | 0.0381    | 0.0396    | 0.0604    |
| IR Inten --       | 4.4658    | 8.9220    | 9.4212    |
|                   | 4         | 5         | 6         |

|                |           |           |           |
|----------------|-----------|-----------|-----------|
|                | A         | A         | A         |
| Frequencies -- | 142.4336  | 196.2905  | 225.2957  |
| Red. masses -- | 3.2316    | 3.2776    | 2.4576    |
| Frc consts --  | 0.0386    | 0.0744    | 0.0735    |
| IR Inten --    | 5.0718    | 4.1180    | 13.4615   |
|                | 7         | 8         | 9         |
|                | A         | A         | A         |
| Frequencies -- | 230.1559  | 244.1013  | 275.2832  |
| Red. masses -- | 1.2815    | 1.0532    | 2.5530    |
| Frc consts --  | 0.0400    | 0.0370    | 0.1140    |
| IR Inten --    | 13.7168   | 0.1699    | 38.4508   |
|                | 10        | 11        | 12        |
|                | A         | A         | A         |
| Frequencies -- | 308.5699  | 339.9572  | 364.0447  |
| Red. masses -- | 2.3396    | 3.9719    | 4.5972    |
| Frc consts --  | 0.1312    | 0.2705    | 0.3590    |
| IR Inten --    | 4.6774    | 10.5409   | 31.2398   |
|                | 13        | 14        | 15        |
|                | A         | A         | A         |
| Frequencies -- | 465.8716  | 504.5401  | 509.0289  |
| Red. masses -- | 4.9947    | 9.3435    | 9.4915    |
| Frc consts --  | 0.6387    | 1.4014    | 1.4490    |
| IR Inten --    | 6.2559    | 15.2611   | 16.7824   |
|                | 16        | 17        | 18        |
|                | A         | A         | A         |
| Frequencies -- | 544.1688  | 760.9793  | 862.5638  |
| Red. masses -- | 6.8515    | 6.5942    | 3.1248    |
| Frc consts --  | 1.1954    | 2.2499    | 1.3698    |
| IR Inten --    | 111.3187  | 68.8615   | 33.3078   |
|                | 19        | 20        | 21        |
|                | A         | A         | A         |
| Frequencies -- | 900.1274  | 914.8368  | 978.2104  |
| Red. masses -- | 1.1274    | 1.0930    | 2.1850    |
| Frc consts --  | 0.5382    | 0.5390    | 1.2319    |
| IR Inten --    | 86.2093   | 40.5918   | 125.8032  |
|                | 22        | 23        | 24        |
|                | A         | A         | A         |
| Frequencies -- | 991.1169  | 1004.3542 | 1027.5976 |
| Red. masses -- | 1.4131    | 3.3645    | 1.5253    |
| Frc consts --  | 0.8178    | 1.9996    | 0.9490    |
| IR Inten --    | 4.9783    | 174.0657  | 4.9481    |
|                | 25        | 26        | 27        |
|                | A         | A         | A         |
| Frequencies -- | 1054.4287 | 1094.3651 | 1161.6778 |

|                |           |           |           |
|----------------|-----------|-----------|-----------|
| Red. masses -- | 2.1500    | 5.7922    | 3.0954    |
| Frc consts --  | 1.4084    | 4.0871    | 2.4612    |
| IR Inten --    | 47.1676   | 301.1758  | 38.3857   |
|                | 28        | 29        | 30        |
|                | A         | A         | A         |
| Frequencies -- | 1174.4127 | 1218.7649 | 1229.9426 |
| Red. masses -- | 3.7284    | 1.4000    | 2.5470    |
| Frc consts --  | 3.0298    | 1.2253    | 2.2701    |
| IR Inten --    | 280.0845  | 8.2245    | 90.8802   |
|                | 31        | 32        | 33        |
|                | A         | A         | A         |
| Frequencies -- | 1334.8733 | 1380.5427 | 1391.9666 |
| Red. masses -- | 1.2428    | 1.2296    | 1.2013    |
| Frc consts --  | 1.3047    | 1.3807    | 1.3714    |
| IR Inten --    | 0.2282    | 8.4775    | 10.1435   |
|                | 34        | 35        | 36        |
|                | A         | A         | A         |
| Frequencies -- | 1450.9509 | 1471.7316 | 1475.7659 |
| Red. masses -- | 1.1465    | 1.0465    | 1.0484    |
| Frc consts --  | 1.4221    | 1.3355    | 1.3453    |
| IR Inten --    | 14.5642   | 3.9277    | 6.1564    |
|                | 37        | 38        | 39        |
|                | A         | A         | A         |
| Frequencies -- | 1481.1453 | 1521.0315 | 1527.6451 |
| Red. masses -- | 1.1737    | 1.0433    | 1.0853    |
| Frc consts --  | 1.5171    | 1.4221    | 1.4922    |
| IR Inten --    | 5.2315    | 6.9191    | 40.0044   |
|                | 40        | 41        | 42        |
|                | A         | A         | A         |
| Frequencies -- | 1537.3073 | 1554.0909 | 1573.8605 |
| Red. masses -- | 1.0920    | 1.0952    | 1.1493    |
| Frc consts --  | 1.5205    | 1.5585    | 1.6773    |
| IR Inten --    | 29.0578   | 33.7107   | 11.8082   |
|                | 43        | 44        | 45        |
|                | A         | A         | A         |
| Frequencies -- | 1696.3344 | 2565.3698 | 3087.8470 |
| Red. masses -- | 1.0588    | 1.1047    | 1.0424    |
| Frc consts --  | 1.7951    | 4.2833    | 5.8562    |
| IR Inten --    | 82.1157   | 1527.5350 | 8.8298    |
|                | 46        | 47        | 48        |
|                | A         | A         | A         |
| Frequencies -- | 3090.1299 | 3094.6161 | 3164.6115 |
| Red. masses -- | 1.0449    | 1.0300    | 1.1152    |
| Frc consts --  | 5.8785    | 5.8117    | 6.5805    |

|                  |           |           |           |
|------------------|-----------|-----------|-----------|
| IR Inten --      | 60.5338   | 1.7224    | 12.6226   |
| 49               | 50        | 51        |           |
| A                | A         | A         |           |
| Frequencies --   | 3195.5964 | 3203.5314 | 3209.5362 |
| Red. masses --   | 1.1076    | 1.1075    | 1.1062    |
| Frc consts --    | 6.6638    | 6.6964    | 6.7137    |
| IR Inten --      | 2.6163    | 1.9411    | 0.5227    |
| 52               | 53        | 54        |           |
| A                | A         | A         |           |
| Frequencies --   | 3211.6795 | 3292.3571 | 3503.7058 |
| Red. masses --   | 1.1066    | 1.0696    | 1.0758    |
| Frc consts --    | 6.7250    | 6.8313    | 7.7808    |
| IR Inten --      | 0.4860    | 880.8586  | 44.6537   |
| <b>GL-SA-MA:</b> |           |           |           |
| 1                | 2         | 3         |           |
| A                | A         | A         |           |
| Frequencies --   | 65.2753   | 82.8055   | 91.7339   |
| Red. masses --   | 7.8120    | 6.9382    | 7.3438    |
| Frc consts --    | 0.0196    | 0.0280    | 0.0364    |
| IR Inten --      | 9.1324    | 0.0529    | 2.4817    |
| 4                | 5         | 6         |           |
| A                | A         | A         |           |
| Frequencies --   | 104.7361  | 130.4404  | 150.0454  |
| Red. masses --   | 5.1447    | 3.7256    | 2.3913    |
| Frc consts --    | 0.0333    | 0.0373    | 0.0317    |
| IR Inten --      | 6.2227    | 10.8540   | 2.5008    |
| 7                | 8         | 9         |           |
| A                | A         | A         |           |
| Frequencies --   | 182.8207  | 192.5029  | 226.1156  |
| Red. masses --   | 7.0891    | 1.2850    | 7.5154    |
| Frc consts --    | 0.1396    | 0.0281    | 0.2264    |
| IR Inten --      | 12.6979   | 8.8906    | 21.4471   |
| 10               | 11        | 12        |           |
| A                | A         | A         |           |
| Frequencies --   | 289.9912  | 324.0854  | 345.6229  |
| Red. masses --   | 3.2662    | 2.7475    | 2.3967    |
| Frc consts --    | 0.1618    | 0.1700    | 0.1687    |
| IR Inten --      | 5.4257    | 23.8571   | 101.7594  |
| 13               | 14        | 15        |           |
| A                | A         | A         |           |
| Frequencies --   | 402.2580  | 434.3072  | 460.0892  |
| Red. masses --   | 7.8961    | 3.6587    | 1.8252    |
| Frc consts --    | 0.7528    | 0.4066    | 0.2276    |
| IR Inten --      | 5.3506    | 27.1083   | 45.2695   |

|                |           |           |           |
|----------------|-----------|-----------|-----------|
|                | 16        | 17        | 18        |
|                | A         | A         | A         |
| Frequencies -- | 530.9376  | 560.0007  | 565.0915  |
| Red. masses -- | 10.1189   | 10.5197   | 9.4133    |
| Frc consts --  | 1.6806    | 1.9437    | 1.7710    |
| IR Inten --    | 13.0724   | 23.7986   | 78.1638   |
|                | 19        | 20        | 21        |
|                | A         | A         | A         |
| Frequencies -- | 586.4812  | 664.6268  | 718.7700  |
| Red. masses -- | 5.4460    | 3.0949    | 15.2750   |
| Frc consts --  | 1.1037    | 0.8055    | 4.6495    |
| IR Inten --    | 41.1547   | 0.6576    | 217.6144  |
|                | 22        | 23        | 24        |
|                | A         | A         | A         |
| Frequencies -- | 751.2969  | 928.5292  | 962.8441  |
| Red. masses -- | 3.5325    | 1.1940    | 2.5830    |
| Frc consts --  | 1.1748    | 0.6065    | 1.4109    |
| IR Inten --    | 18.0197   | 38.9247   | 5.6202    |
|                | 25        | 26        | 27        |
|                | A         | A         | A         |
| Frequencies -- | 982.9676  | 1010.4937 | 1052.7916 |
| Red. masses -- | 4.2489    | 1.3257    | 2.4439    |
| Frc consts --  | 2.4188    | 0.7975    | 1.5960    |
| IR Inten --    | 74.3896   | 212.6617  | 14.8897   |
|                | 28        | 29        | 30        |
|                | A         | A         | A         |
| Frequencies -- | 1063.0057 | 1097.1059 | 1140.3468 |
| Red. masses -- | 3.1213    | 3.1761    | 1.7519    |
| Frc consts --  | 2.0780    | 2.2524    | 1.3422    |
| IR Inten --    | 87.1108   | 122.7231  | 83.0177   |
|                | 31        | 32        | 33        |
|                | A         | A         | A         |
| Frequencies -- | 1171.6601 | 1204.7472 | 1240.3491 |
| Red. masses -- | 1.5784    | 1.4751    | 1.9640    |
| Frc consts --  | 1.2767    | 1.2614    | 1.7803    |
| IR Inten --    | 174.1678  | 9.0052    | 67.4354   |
|                | 34        | 35        | 36        |
|                | A         | A         | A         |
| Frequencies -- | 1289.7940 | 1347.1797 | 1379.8100 |
| Red. masses -- | 6.8925    | 1.3792    | 1.2545    |
| Frc consts --  | 6.7557    | 1.4748    | 1.4072    |
| IR Inten --    | 535.1308  | 29.4898   | 5.9030    |
|                | 37        | 38        | 39        |
|                | A         | A         | A         |

|                  |           |           |           |
|------------------|-----------|-----------|-----------|
| Frequencies --   | 1397.9850 | 1427.5977 | 1481.5810 |
| Red. masses --   | 1.1880    | 1.2385    | 1.1712    |
| Frc consts --    | 1.3680    | 1.4872    | 1.5147    |
| IR Inten --      | 26.6800   | 38.3982   | 0.7638    |
|                  | 40        | 41        | 42        |
|                  | A         | A         | A         |
| Frequencies --   | 1504.7367 | 1522.6957 | 1525.2246 |
| Red. masses --   | 1.1567    | 1.0484    | 1.0825    |
| Frc consts --    | 1.5431    | 1.4322    | 1.4838    |
| IR Inten --      | 20.4209   | 19.1131   | 26.9058   |
|                  | 43        | 44        | 45        |
|                  | A         | A         | A         |
| Frequencies --   | 1563.4032 | 1677.2653 | 1785.1460 |
| Red. masses --   | 1.2698    | 1.0738    | 9.3018    |
| Frc consts --    | 1.8286    | 1.7799    | 17.4649   |
| IR Inten --      | 53.7916   | 55.9334   | 66.2285   |
|                  | 46        | 47        | 48        |
|                  | A         | A         | A         |
| Frequencies --   | 2687.5731 | 3030.3478 | 3049.4065 |
| Red. masses --   | 1.0980    | 1.0901    | 1.0837    |
| Frc consts --    | 4.6727    | 5.8978    | 5.9372    |
| IR Inten --      | 1341.4578 | 35.0451   | 52.1005   |
|                  | 49        | 50        | 51        |
|                  | A         | A         | A         |
| Frequencies --   | 3111.1095 | 3141.7641 | 3212.5871 |
| Red. masses --   | 1.0320    | 1.0707    | 1.1077    |
| Frc consts --    | 5.8851    | 6.2270    | 6.7359    |
| IR Inten --      | 6.9616    | 1456.6344 | 4.8789    |
|                  | 52        | 53        | 54        |
|                  | A         | A         | A         |
| Frequencies --   | 3242.8445 | 3454.6780 | 3734.0145 |
| Red. masses --   | 1.1062    | 1.0749    | 1.0659    |
| Frc consts --    | 6.8538    | 7.5581    | 8.7564    |
| IR Inten --      | 2.7867    | 82.1755   | 97.0923   |
| <b>MG-SA-MA:</b> |           |           |           |
|                  | 1         | 2         | 3         |
|                  | A         | A         | A         |
| Frequencies --   | 54.0329   | 83.7476   | 87.6559   |
| Red. masses --   | 10.7056   | 7.0711    | 7.3963    |
| Frc consts --    | 0.0184    | 0.0292    | 0.0335    |
| IR Inten --      | 0.6070    | 1.5824    | 3.6008    |
|                  | 4         | 5         | 6         |
|                  | A         | A         | A         |
| Frequencies --   | 108.9031  | 114.6070  | 150.7751  |

|                |          |          |          |
|----------------|----------|----------|----------|
| Red. masses -- | 3.9568   | 4.5370   | 4.3819   |
| Frc consts --  | 0.0276   | 0.0351   | 0.0587   |
| IR Inten --    | 2.2777   | 8.1735   | 1.7234   |
|                | 7        | 8        | 9        |
|                | A        | A        | A        |
| Frequencies -- | 180.7309 | 191.2905 | 203.8618 |
| Red. masses -- | 1.0957   | 3.3387   | 1.7821   |
| Frc consts --  | 0.0211   | 0.0720   | 0.0436   |
| IR Inten --    | 1.4295   | 15.2278  | 2.5628   |
|                | 10       | 11       | 12       |
|                | A        | A        | A        |
| Frequencies -- | 223.8718 | 268.6351 | 284.5935 |
| Red. masses -- | 2.1475   | 3.1598   | 1.9339   |
| Frc consts --  | 0.0634   | 0.1343   | 0.0923   |
| IR Inten --    | 16.6361  | 62.8847  | 27.7689  |
|                | 13       | 14       | 15       |
|                | A        | A        | A        |
| Frequencies -- | 294.5798 | 357.5940 | 396.6018 |
| Red. masses -- | 3.0327   | 3.9467   | 4.4259   |
| Frc consts --  | 0.1551   | 0.2974   | 0.4102   |
| IR Inten --    | 59.7504  | 12.6577  | 18.4522  |
|                | 16       | 17       | 18       |
|                | A        | A        | A        |
| Frequencies -- | 418.5474 | 444.4931 | 482.1560 |
| Red. masses -- | 3.2321   | 2.9277   | 4.5310   |
| Frc consts --  | 0.3336   | 0.3408   | 0.6206   |
| IR Inten --    | 16.6851  | 13.2900  | 2.5152   |
|                | 19       | 20       | 21       |
|                | A        | A        | A        |
| Frequencies -- | 546.2630 | 555.3338 | 566.2777 |
| Red. masses -- | 13.1390  | 10.0734  | 3.8287   |
| Frc consts --  | 2.3100   | 1.8303   | 0.7234   |
| IR Inten --    | 10.1103  | 116.7773 | 7.5862   |
|                | 22       | 23       | 24       |
|                | A        | A        | A        |
| Frequencies -- | 573.2151 | 628.2274 | 753.7979 |
| Red. masses -- | 14.6850  | 3.1850   | 17.0455  |
| Frc consts --  | 2.8429   | 0.7406   | 5.7065   |
| IR Inten --    | 24.8307  | 5.4204   | 224.8365 |
|                | 25       | 26       | 27       |
|                | A        | A        | A        |
| Frequencies -- | 797.1677 | 884.6904 | 942.5076 |
| Red. masses -- | 2.4906   | 2.1879   | 1.4124   |
| Frc consts --  | 0.9325   | 1.0089   | 0.7392   |



|             |    |           |           |           |
|-------------|----|-----------|-----------|-----------|
| IR Inten    | -- | 13.5728   | 12.8486   | 12.1818   |
|             |    | 28        | 29        | 30        |
|             |    | A         | A         | A         |
| Frequencies | -- | 989.7655  | 996.7203  | 1019.4772 |
| Red. masses | -- | 1.2156    | 6.3031    | 1.7146    |
| Frc consts  | -- | 0.7016    | 3.6893    | 1.0500    |
| IR Inten    | -- | 52.6082   | 323.3116  | 1.1820    |
|             |    | 31        | 32        | 33        |
|             |    | A         | A         | A         |
| Frequencies | -- | 1039.3289 | 1060.2621 | 1089.6845 |
| Red. masses | -- | 2.1703    | 2.6006    | 6.0968    |
| Frc consts  | -- | 1.3813    | 1.7225    | 4.2654    |
| IR Inten    | -- | 13.3993   | 38.7637   | 283.9487  |
|             |    | 34        | 35        | 36        |
|             |    | A         | A         | A         |
| Frequencies | -- | 1137.3702 | 1151.3561 | 1183.2931 |
| Red. masses | -- | 1.4020    | 2.1682    | 1.4872    |
| Frc consts  | -- | 1.0686    | 1.6934    | 1.2269    |
| IR Inten    | -- | 132.3796  | 109.7512  | 7.6146    |
|             |    | 37        | 38        | 39        |
|             |    | A         | A         | A         |
| Frequencies | -- | 1223.9142 | 1254.6029 | 1290.0207 |
| Red. masses | -- | 2.6113    | 1.5608    | 4.8335    |
| Frc consts  | -- | 2.3046    | 1.4475    | 4.7392    |
| IR Inten    | -- | 71.1822   | 64.8851   | 441.5457  |
|             |    | 40        | 41        | 42        |
|             |    | A         | A         | A         |
| Frequencies | -- | 1331.4747 | 1369.4673 | 1405.4630 |
| Red. masses | -- | 1.5020    | 1.2749    | 1.3731    |
| Frc consts  | -- | 1.5688    | 1.4087    | 1.5980    |
| IR Inten    | -- | 35.5429   | 6.8246    | 34.6401   |
|             |    | 43        | 44        | 45        |
|             |    | A         | A         | A         |
| Frequencies | -- | 1410.0997 | 1474.9434 | 1484.8269 |
| Red. masses | -- | 1.5838    | 1.1725    | 1.0704    |
| Frc consts  | -- | 1.8555    | 1.5029    | 1.3904    |
| IR Inten    | -- | 26.1669   | 1.6118    | 12.9369   |
|             |    | 46        | 47        | 48        |
|             |    | A         | A         | A         |
| Frequencies | -- | 1495.9804 | 1518.1154 | 1524.4281 |
| Red. masses | -- | 1.0558    | 1.0752    | 1.0691    |
| Frc consts  | -- | 1.3921    | 1.4600    | 1.4638    |
| IR Inten    | -- | 14.3199   | 29.3479   | 8.4088    |
|             |    | 49        | 50        | 51        |

|                |           |           |           |
|----------------|-----------|-----------|-----------|
|                | A         | A         | A         |
| Frequencies -- | 1532.3429 | 1586.7490 | 1671.4137 |
| Red. masses -- | 1.0927    | 1.1273    | 1.0613    |
| Frc consts --  | 1.5117    | 1.6722    | 1.7468    |
| IR Inten --    | 46.4541   | 55.6757   | 18.3989   |
|                | 52        | 53        | 54        |
|                | A         | A         | A         |
| Frequencies -- | 1776.4415 | 2588.9268 | 3070.9063 |
| Red. masses -- | 10.8099   | 1.1024    | 1.0451    |
| Frc consts --  | 20.0990   | 4.3533    | 5.8068    |
| IR Inten --    | 90.5132   | 1614.7754 | 1.4387    |
|                | 55        | 56        | 57        |
|                | A         | A         | A         |
| Frequencies -- | 3073.0554 | 3098.5164 | 3155.7351 |
| Red. masses -- | 1.0738    | 1.0319    | 1.0982    |
| Frc consts --  | 5.9748    | 5.8370    | 6.4438    |
| IR Inten --    | 50.2986   | 9.0579    | 2.4755    |
|                | 58        | 59        | 60        |
|                | A         | A         | A         |
| Frequencies -- | 3197.1609 | 3202.8188 | 3215.9663 |
| Red. masses -- | 1.1048    | 1.1070    | 1.1069    |
| Frc consts --  | 6.6539    | 6.6906    | 6.7451    |
| IR Inten --    | 2.3643    | 2.2581    | 0.3539    |
|                | 61        | 62        | 63        |
|                | A         | A         | A         |
| Frequencies -- | 3250.7932 | 3444.1929 | 3744.0656 |
| Red. masses -- | 1.0695    | 1.0745    | 1.0662    |
| Frc consts --  | 6.6593    | 7.5101    | 8.8059    |
| IR Inten --    | 1038.0211 | 72.9693   | 120.5679  |

**MG-MSA-MA:**

|                |          |          |          |
|----------------|----------|----------|----------|
|                | 1        | 2        | 3        |
|                | A        | A        | A        |
| Frequencies -- | 55.8464  | 87.8874  | 94.9769  |
| Red. masses -- | 7.7490   | 4.6296   | 5.7742   |
| Frc consts --  | 0.0142   | 0.0211   | 0.0307   |
| IR Inten --    | 2.3521   | 3.5430   | 2.1907   |
|                | 4        | 5        | 6        |
|                | A        | A        | A        |
| Frequencies -- | 115.4119 | 125.6575 | 154.3867 |
| Red. masses -- | 4.1319   | 4.7601   | 3.0537   |
| Frc consts --  | 0.0324   | 0.0443   | 0.0429   |
| IR Inten --    | 1.5455   | 8.9745   | 5.1193   |
|                | 7        | 8        | 9        |
|                | A        | A        | A        |

|                |          |          |           |
|----------------|----------|----------|-----------|
| Frequencies -- | 168.2253 | 195.1649 | 199.8551  |
| Red. masses -- | 1.1036   | 3.4537   | 2.0877    |
| Frc consts --  | 0.0184   | 0.0775   | 0.0491    |
| IR Inten --    | 0.2520   | 15.7319  | 1.6138    |
|                | 10       | 11       | 12        |
|                | A        | A        | A         |
| Frequencies -- | 220.7375 | 257.3699 | 269.9108  |
| Red. masses -- | 1.6540   | 1.0977   | 3.2883    |
| Frc consts --  | 0.0475   | 0.0428   | 0.1411    |
| IR Inten --    | 9.8133   | 3.5242   | 39.2285   |
|                | 13       | 14       | 15        |
|                | A        | A        | A         |
| Frequencies -- | 295.1558 | 330.3611 | 356.5829  |
| Red. masses -- | 3.7393   | 4.5754   | 4.6621    |
| Frc consts --  | 0.1919   | 0.2942   | 0.3493    |
| IR Inten --    | 19.8714  | 17.1184  | 10.7972   |
|                | 16       | 17       | 18        |
|                | A        | A        | A         |
| Frequencies -- | 363.4400 | 433.5576 | 487.5429  |
| Red. masses -- | 4.0965   | 2.8209   | 4.5745    |
| Frc consts --  | 0.3188   | 0.3124   | 0.6407    |
| IR Inten --    | 19.5984  | 12.2543  | 8.2317    |
|                | 19       | 20       | 21        |
|                | A        | A        | A         |
| Frequencies -- | 510.5353 | 530.3306 | 535.5457  |
| Red. masses -- | 9.1816   | 6.8828   | 8.5390    |
| Frc consts --  | 1.4100   | 1.1405   | 1.4430    |
| IR Inten --    | 26.3654  | 32.9101  | 92.5628   |
|                | 22       | 23       | 24        |
|                | A        | A        | A         |
| Frequencies -- | 568.0764 | 632.6382 | 756.4016  |
| Red. masses -- | 3.7138   | 3.1782   | 6.7609    |
| Frc consts --  | 0.7061   | 0.7494   | 2.2791    |
| IR Inten --    | 9.3616   | 5.6062   | 33.9847   |
|                | 25       | 26       | 27        |
|                | A        | A        | A         |
| Frequencies -- | 802.4521 | 888.6281 | 943.0980  |
| Red. masses -- | 2.4625   | 2.0551   | 1.4633    |
| Frc consts --  | 0.9342   | 0.9562   | 0.7668    |
| IR Inten --    | 7.8218   | 5.0448   | 5.9546    |
|                | 28       | 29       | 30        |
|                | A        | A        | A         |
| Frequencies -- | 967.5770 | 983.3417 | 1002.0782 |
| Red. masses -- | 2.8964   | 2.5893   | 1.3041    |

|                |           |           |           |
|----------------|-----------|-----------|-----------|
| Frc consts --  | 1.5976    | 1.4751    | 0.7715    |
| IR Inten --    | 193.3262  | 141.4125  | 33.7891   |
|                | 31        | 32        | 33        |
|                | A         | A         | A         |
| Frequencies -- | 1010.4498 | 1018.5641 | 1033.7522 |
| Red. masses -- | 1.4362    | 1.7391    | 2.0643    |
| Frc consts --  | 0.8640    | 1.0631    | 1.2998    |
| IR Inten --    | 70.3791   | 1.2231    | 103.6298  |
|                | 34        | 35        | 36        |
|                | A         | A         | A         |
| Frequencies -- | 1059.2935 | 1070.0117 | 1149.4335 |
| Red. masses -- | 2.6621    | 2.3204    | 2.2391    |
| Frc consts --  | 1.7600    | 1.5653    | 1.7430    |
| IR Inten --    | 146.4357  | 67.3472   | 96.1366   |
|                | 37        | 38        | 39        |
|                | A         | A         | A         |
| Frequencies -- | 1186.2563 | 1222.7024 | 1238.7483 |
| Red. masses -- | 1.5034    | 2.6198    | 2.8134    |
| Frc consts --  | 1.2465    | 2.3076    | 2.5436    |
| IR Inten --    | 20.3901   | 64.7437   | 279.6224  |
|                | 40        | 41        | 42        |
|                | A         | A         | A         |
| Frequencies -- | 1254.7564 | 1331.7354 | 1365.5283 |
| Red. masses -- | 2.7710    | 1.4703    | 1.2817    |
| Frc consts --  | 2.5704    | 1.5363    | 1.4081    |
| IR Inten --    | 271.4187  | 32.5754   | 6.1266    |
|                | 43        | 44        | 45        |
|                | A         | A         | A         |
| Frequencies -- | 1380.8948 | 1403.3368 | 1410.9851 |
| Red. masses -- | 1.2286    | 1.3571    | 1.5902    |
| Frc consts --  | 1.3803    | 1.5747    | 1.8653    |
| IR Inten --    | 14.0135   | 43.5278   | 15.5679   |
|                | 46        | 47        | 48        |
|                | A         | A         | A         |
| Frequencies -- | 1473.3846 | 1474.3593 | 1476.1279 |
| Red. masses -- | 1.1510    | 1.0600    | 1.0497    |
| Frc consts --  | 1.4722    | 1.3576    | 1.3477    |
| IR Inten --    | 2.8160    | 3.3336    | 4.1443    |
|                | 49        | 50        | 51        |
|                | A         | A         | A         |
| Frequencies -- | 1483.9213 | 1497.1365 | 1519.8138 |
| Red. masses -- | 1.0697    | 1.0548    | 1.0437    |
| Frc consts --  | 1.3878    | 1.3930    | 1.4204    |
| IR Inten --    | 11.1846   | 12.2973   | 11.3570   |

|                |           |           |           |
|----------------|-----------|-----------|-----------|
|                | 52        | 53        | 54        |
|                | A         | A         | A         |
| Frequencies -- | 1530.5372 | 1538.5443 | 1622.0726 |
| Red. masses -- | 1.0534    | 1.1392    | 1.1101    |
| Frc consts --  | 1.4539    | 1.5888    | 1.7210    |
| IR Inten --    | 2.9122    | 81.8996   | 35.0822   |
|                | 55        | 56        | 57        |
|                | A         | A         | A         |
| Frequencies -- | 1673.9153 | 1773.2583 | 2315.8830 |
| Red. masses -- | 1.0640    | 10.6492   | 1.1271    |
| Frc consts --  | 1.7566    | 19.7293   | 3.5615    |
| IR Inten --    | 24.2651   | 87.5078   | 2072.7708 |
|                | 58        | 59        | 60        |
|                | A         | A         | A         |
| Frequencies -- | 3061.6184 | 3073.9533 | 3087.9972 |
| Red. masses -- | 1.0829    | 1.0354    | 1.0302    |
| Frc consts --  | 5.9805    | 5.7646    | 5.7882    |
| IR Inten --    | 78.8666   | 7.5502    | 2.4124    |
|                | 61        | 62        | 63        |
|                | A         | A         | A         |
| Frequencies -- | 3095.5229 | 3159.9394 | 3181.8649 |
| Red. masses -- | 1.0324    | 1.0990    | 1.0716    |
| Frc consts --  | 5.8284    | 6.4654    | 6.3924    |
| IR Inten --    | 12.9489   | 3.5141    | 1022.1144 |
|                | 64        | 65        | 66        |
|                | A         | A         | A         |
| Frequencies -- | 3195.1351 | 3197.6894 | 3200.3385 |
| Red. masses -- | 1.1034    | 1.1064    | 1.1064    |
| Frc consts --  | 6.6370    | 6.6655    | 6.6764    |
| IR Inten --    | 56.3210   | 8.1333    | 1.0220    |
|                | 67        | 68        | 69        |
|                | A         | A         | A         |
| Frequencies -- | 3206.2588 | 3215.0661 | 3467.8766 |
| Red. masses -- | 1.1060    | 1.1066    | 1.0741    |
| Frc consts --  | 6.6989    | 6.7392    | 7.6103    |
| IR Inten --    | 0.7083    | 0.1791    | 53.5531   |
